# Supplementary material for: Identification and Validation of a PEX5-Dependent Signature for Prognostic Prediction in Glioma
Source: Preprints.org preprint supplement (doi:10.20944/preprints202309.1748.v1), 2023-09-26
Supplement: Supplementary file 1 [file supplementary]

## Sheet: Table S1
sample	event	time	Risk score	IDH	age	gender	grade	Meth	1p19q
TCGA-02-0047-01A	1	448	-4.81846	WT	78	male	G4	Unmethylated	non-codel
TCGA-02-0055-01A	1	76	-2.78254	WT	62	female	G4	Unmethylated	non-codel
TCGA-02-2483-01A	0	466	-4.90423	Mutant	43	male	G4	Methylated	non-codel
TCGA-02-2485-01A	0	470	-3.68798	WT	53	male	G4	Unmethylated	non-codel
TCGA-02-2486-01A	1	618	-2.53311	WT	64	male	G4	Unmethylated	non-codel
TCGA-06-0125-02A	1	1448	-4.31446	WT	63	female	G4	Methylated	non-codel
TCGA-06-0125-01A	1	1448	-3.82328	WT	63	female	G4	Methylated	non-codel
TCGA-06-0129-01A	1	1024	-4.70695	Mutant	30	male	G4	Methylated	non-codel
TCGA-06-0130-01A	1	394	-2.55267	WT	54	male	G4	Unmethylated	non-codel
TCGA-06-0132-01A	1	771	-3.52631	WT	49	male	G4	NA	non-codel
TCGA-06-0138-01A	1	737	-3.05273	WT	43	male	G4	NA	non-codel
TCGA-06-0139-01A	1	362	-2.29166	WT	40	male	G4	Unmethylated	non-codel
TCGA-06-0141-01A	1	313	-2.47504	WT	62	male	G4	Unmethylated	non-codel
TCGA-06-0152-02A	1	375	-3.16266	WT	68	male	G4	NA	non-codel
TCGA-06-0156-01A	1	178	-3.11025	Mutant	57	male	G4	NA	NA
TCGA-06-0157-01A	1	97	-3.68748	WT	63	female	G4	NA	non-codel
TCGA-06-0158-01A	1	329	-4.25533	WT	73	male	G4	NA	non-codel
TCGA-06-0168-01A	1	598	-3.65231	WT	59	female	G4	NA	non-codel
TCGA-06-0171-02A	1	399	-3.75974	WT	65	male	G4	NA	non-codel
TCGA-06-0174-01A	1	98	-4.67255	WT	54	male	G4	NA	non-codel
TCGA-06-0178-01A	1	2681	-4.12284	Mutant	38	male	G4	NA	non-codel
TCGA-06-0184-01A	1	2126	-2.6639	WT	63	male	G4	NA	non-codel
TCGA-06-0187-01A	1	828	-3.19441	WT	69	male	G4	NA	non-codel
TCGA-06-0190-01A	1	317	-2.65786	WT	62	male	G4	NA	non-codel
TCGA-06-0190-02A	1	317	-2.82471	WT	62	male	G4	NA	non-codel
TCGA-06-0210-01A	1	225	-3.0364	WT	72	female	G4	NA	non-codel
TCGA-06-0210-02A	1	225	-3.22947	WT	72	female	G4	NA	non-codel
TCGA-06-0211-02A	1	360	-2.8965	WT	47	male	G4	NA	non-codel
TCGA-06-0211-01B	1	360	-2.9005	WT	47	male	G4	NA	non-codel
TCGA-06-0211-01A	1	360	-2.98842	WT	47	male	G4	NA	non-codel
TCGA-06-0219-01A	1	22	-3.42034	WT	67	male	G4	NA	non-codel
TCGA-06-0221-02A	1	603	-5.22501	Mutant	31	male	G4	NA	non-codel
TCGA-06-0238-01A	1	405	-3.83659	WT	46	male	G4	NA	non-codel
TCGA-06-0644-01A	1	384	-1.40872	WT	71	male	G4	NA	non-codel
TCGA-06-0645-01A	1	175	-3.18739	WT	55	female	G4	NA	non-codel
TCGA-06-0646-01A	1	175	-3.66797	WT	60	male	G4	NA	non-codel
TCGA-06-0649-01B	1	64	-3.81179	WT	73	female	G4	NA	non-codel
TCGA-06-0686-01A	1	432	-3.78502	WT	53	male	G4	NA	non-codel
TCGA-06-0743-01A	1	803	-2.99874	WT	69	male	G4	NA	non-codel
TCGA-06-0744-01A	1	1426	-3.34957	WT	66	male	G4	NA	non-codel
TCGA-06-0745-01A	1	239	-3.98553	WT	59	male	G4	NA	non-codel
TCGA-06-0747-01A	1	82	-3.12951	WT	53	male	G4	NA	non-codel
TCGA-06-0749-01A	1	82	-3.80648	WT	50	male	G4	NA	non-codel
TCGA-06-0750-01A	1	28	-3.10589	WT	43	male	G4	NA	non-codel
TCGA-06-0878-01A	0	218	-3.23318	WT	74	male	G4	Unmethylated	non-codel
TCGA-06-0882-01A	1	632	-3.17841	WT	30	male	G4	Unmethylated	non-codel
TCGA-06-1804-01A	1	414	-3.43218	WT	81	female	G4	Methylated	non-codel
TCGA-06-2557-01A	1	33	-3.44625	WT	76	male	G4	Unmethylated	non-codel
TCGA-06-2558-01A	1	380	-4.66333	WT	75	female	G4	Unmethylated	non-codel
TCGA-06-2559-01A	1	150	-4.30302	WT	83	male	G4	Methylated	non-codel
TCGA-06-2561-01A	1	537	-3.62464	WT	53	female	G4	Unmethylated	non-codel
TCGA-06-2562-01A	1	382	-2.50285	WT	81	male	G4	Unmethylated	non-codel
TCGA-06-2563-01A	0	932	-2.74894	WT	72	female	G4	Methylated	non-codel
TCGA-06-2564-01A	0	181	-2.77988	WT	50	male	G4	Unmethylated	non-codel
TCGA-06-2565-01A	1	506	-4.17292	WT	59	male	G4	Methylated	non-codel
TCGA-06-2567-01A	1	133	-3.22423	WT	65	male	G4	Methylated	non-codel
TCGA-06-2569-01A	0	13	-4.84646	WT	24	female	G4	Unmethylated	non-codel
TCGA-06-2570-01A	0	958	-4.72469	Mutant	21	female	G4	Methylated	non-codel
TCGA-06-5408-01A	1	357	-3.87054	WT	54	female	G4	Unmethylated	non-codel
TCGA-06-5410-01A	1	108	-2.95478	WT	72	female	G4	Methylated	non-codel
TCGA-06-5411-01A	1	254	-4.20402	WT	51	male	G4	Unmethylated	non-codel
TCGA-06-5412-01A	1	138	-2.92129	WT	78	female	G4	Methylated	non-codel
TCGA-06-5413-01A	0	268	-3.52609	WT	67	male	G4	Unmethylated	non-codel
TCGA-06-5414-01A	0	273	-3.4843	WT	61	male	G4	Unmethylated	non-codel
TCGA-06-5416-01A	0	204	-4.73237	NA	23	female	G4	Unmethylated	non-codel
TCGA-06-5417-01A	0	155	-5.83505	Mutant	45	female	G4	Methylated	NA
TCGA-06-5418-01A	1	83	-2.52052	WT	75	female	G4	Unmethylated	non-codel
TCGA-06-5856-01A	1	114	-3.66058	WT	58	male	G4	Unmethylated	non-codel
TCGA-06-5858-01A	0	187	-3.60103	WT	45	female	G4	Unmethylated	non-codel
TCGA-06-5859-01A	0	139	-4.17089	WT	63	male	G4	Unmethylated	non-codel
TCGA-08-0386-01A	1	548	-4.02302	WT	74	male	G4	NA	non-codel
TCGA-12-0616-01A	1	448	-4.01418	WT	36	female	G4	NA	non-codel
TCGA-12-0618-01A	1	395	-5.04736	WT	49	male	G4	NA	non-codel
TCGA-12-0619-01A	1	1062	-3.50187	WT	60	male	G4	NA	non-codel
TCGA-12-0821-01A	1	323	-4.29687	WT	62	male	G4	Unmethylated	non-codel
TCGA-12-1597-01B	1	675	-4.65497	WT	62	female	G4	Unmethylated	NA
TCGA-12-3650-01A	1	333	-4.40198	WT	46	male	G4	Unmethylated	non-codel
TCGA-12-3652-01A	1	1062	-4.84576	WT	60	male	G4	Unmethylated	non-codel
TCGA-12-3653-01A	1	442	-2.64679	WT	34	female	G4	Unmethylated	non-codel
TCGA-12-5295-01A	1	454	-2.99005	WT	60	female	G4	Methylated	non-codel
TCGA-12-5299-01A	1	98	-2.8973	WT	56	female	G4	Unmethylated	non-codel
TCGA-14-0736-02A	1	460	-3.17964	NA	49	male	G4	Unmethylated	non-codel
TCGA-14-0781-01B	1	29	-2.82874	WT	49	male	G4	Unmethylated	non-codel
TCGA-14-0787-01A	1	68	-3.37086	WT	69	male	G4	Methylated	non-codel
TCGA-14-0789-01A	1	342	-3.39485	WT	54	male	G4	Methylated	non-codel
TCGA-14-0790-01B	1	419	-4.06084	WT	64	female	G4	Methylated	non-codel
TCGA-14-0817-01A	1	164	-2.48391	WT	69	female	G4	Unmethylated	non-codel
TCGA-14-0871-01A	1	880	-3.38575	WT	74	female	G4	Unmethylated	non-codel
TCGA-14-1034-02B	1	485	-3.60887	WT	60	female	G4	Methylated	non-codel
TCGA-14-1034-01A	1	485	-3.65619	WT	60	female	G4	Methylated	non-codel
TCGA-14-1402-02A	1	975	-3.34348	NA	58	female	G4	Methylated	non-codel
TCGA-14-1823-01A	1	543	-2.85805	WT	58	female	G4	Methylated	non-codel
TCGA-14-1825-01A	1	232	-4.24021	WT	70	male	G4	Unmethylated	non-codel
TCGA-14-1829-01A	0	218	-3.03546	WT	57	male	G4	Unmethylated	non-codel
TCGA-14-2554-01A	1	532	-3.71512	WT	52	female	G4	Unmethylated	non-codel
TCGA-15-0742-01A	1	419	-3.79812	WT	65	male	G4	NA	non-codel
TCGA-15-1444-01A	1	1537	-5.3031	Mutant	21	male	G4	Methylated	non-codel
TCGA-16-0846-01A	1	119	-3.46551	WT	85	male	G4	Methylated	non-codel
TCGA-16-1045-01B	1	883	-3.59058	WT	49	female	G4	Methylated	non-codel
TCGA-19-0957-02A	1	666	-4.21423	WT	48	female	G4	Unmethylated	non-codel
TCGA-19-1389-02A	1	141	-3.02241	WT	51	male	G4	Unmethylated	non-codel
TCGA-19-1390-01A	1	772	-4.20069	WT	63	female	G4	Methylated	non-codel
TCGA-19-1787-01B	1	385	-3.96215	NA	48	male	G4	Methylated	non-codel
TCGA-19-2619-01A	0	294	-4.33932	WT	55	female	G4	Methylated	non-codel
TCGA-19-2620-01A	1	148	-4.49511	WT	70	male	G4	Methylated	non-codel
TCGA-19-2624-01A	1	5	-4.4214	WT	51	male	G4	Unmethylated	non-codel
TCGA-19-2625-01A	1	124	-4.17019	WT	76	female	G4	Unmethylated	non-codel
TCGA-19-2629-01A	1	737	-5.03672	Mutant	60	male	G4	Unmethylated	non-codel
TCGA-19-4065-01A	0	214	-1.27228	NA	36	male	G4	Unmethylated	non-codel
TCGA-19-4065-02A	0	214	-2.94256	NA	36	male	G4	Unmethylated	non-codel
TCGA-19-5960-01A	1	455	-3.24716	WT	56	male	G4	Unmethylated	non-codel
TCGA-26-1442-01A	0	953	-5.45472	Mutant	43	male	G4	Methylated	non-codel
TCGA-26-5132-01A	0	286	-3.39127	WT	74	male	G4	Methylated	non-codel
TCGA-26-5133-01A	0	452	-4.74894	WT	59	male	G4	Unmethylated	non-codel
TCGA-26-5134-01A	0	167	-4.94668	WT	74	male	G4	Unmethylated	non-codel
TCGA-26-5135-01A	1	270	-4.11907	WT	72	female	G4	Methylated	non-codel
TCGA-26-5136-01B	1	577	-3.55608	WT	78	female	G4	Methylated	non-codel
TCGA-26-5139-01A	0	48	-3.61785	WT	65	female	G4	Unmethylated	non-codel
TCGA-27-1830-01A	1	154	-3.06174	WT	57	male	G4	Unmethylated	non-codel
TCGA-27-1831-01A	1	505	-2.60044	WT	66	male	G4	Unmethylated	non-codel
TCGA-27-1832-01A	1	300	-2.85526	WT	59	female	G4	Unmethylated	non-codel
TCGA-27-1834-01A	1	1233	-3.39221	WT	56	male	G4	Methylated	non-codel
TCGA-27-1835-01A	1	648	-3.74914	WT	53	female	G4	Methylated	non-codel
TCGA-27-1837-01A	1	427	-3.87408	WT	36	male	G4	Methylated	non-codel
TCGA-27-2519-01A	1	550	-4.08517	WT	48	male	G4	Unmethylated	non-codel
TCGA-27-2521-01A	1	510	-5.28033	Mutant	34	male	G4	Methylated	non-codel
TCGA-27-2523-01A	1	489	-3.86694	WT	63	male	G4	Methylated	non-codel
TCGA-27-2524-01A	1	231	-3.18151	WT	56	male	G4	Unmethylated	non-codel
TCGA-27-2526-01A	1	87	-3.08884	WT	79	female	G4	Unmethylated	non-codel
TCGA-27-2528-01A	1	480	-3.36987	WT	62	male	G4	Methylated	non-codel
TCGA-28-1747-01C	1	77	-3.21913	WT	44	male	G4	Methylated	non-codel
TCGA-28-1753-01A	0	37	-3.47752	WT	53	male	G4	Unmethylated	non-codel
TCGA-28-2499-01A	1	95	-3.21696	WT	59	male	G4	Unmethylated	NA
TCGA-28-2509-01A	0	145	-2.95746	WT	77	female	G4	Methylated	non-codel
TCGA-28-2513-01A	0	222	-3.04033	WT	69	female	G4	Unmethylated	non-codel
TCGA-28-2514-01A	0	160	-5.40597	WT	45	male	G4	Unmethylated	non-codel
TCGA-28-5204-01A	1	454	-3.00132	WT	72	male	G4	Unmethylated	non-codel
TCGA-28-5207-01A	1	343	-2.71321	WT	71	male	G4	Unmethylated	non-codel
TCGA-28-5208-01A	1	544	-4.0963	WT	52	male	G4	Methylated	non-codel
TCGA-28-5209-01A	0	442	-3.83981	WT	66	female	G4	Methylated	non-codel
TCGA-28-5213-01A	1	951	-3.22815	WT	72	male	G4	Unmethylated	non-codel
TCGA-28-5215-01A	1	335	-4.17934	WT	62	female	G4	Methylated	non-codel
TCGA-28-5216-01A	0	415	-5.02792	WT	52	male	G4	Unmethylated	non-codel
TCGA-28-5218-01A	1	157	-3.69271	WT	63	male	G4	Unmethylated	non-codel
TCGA-28-5220-01A	1	388	-3.32333	WT	67	male	G4	Unmethylated	non-codel
TCGA-32-1970-01A	1	468	-3.22917	WT	59	male	G4	Unmethylated	non-codel
TCGA-32-1980-01A	1	36	-3.54229	WT	72	male	G4	Unmethylated	non-codel
TCGA-32-1982-01A	1	142	-3.11334	WT	76	female	G4	Methylated	non-codel
TCGA-32-2615-01A	1	485	-2.92964	WT	62	male	G4	Unmethylated	non-codel
TCGA-32-2616-01A	1	224	-3.50504	NA	48	female	G4	Methylated	non-codel
TCGA-32-2632-01A	1	269	-3.42341	WT	80	male	G4	Unmethylated	non-codel
TCGA-32-2634-01A	0	693	-5.05717	WT	82	male	G4	Methylated	non-codel
TCGA-32-2638-01A	1	766	-3.77697	WT	67	male	G4	Methylated	non-codel
TCGA-32-4213-01A	0	604	-4.05454	WT	47	female	G4	Methylated	non-codel
TCGA-32-5222-01A	1	585	-3.43978	WT	66	male	G4	Methylated	non-codel
TCGA-41-2571-01A	1	26	-3.82531	WT	89	male	G4	Unmethylated	non-codel
TCGA-41-2572-01A	1	406	-3.48057	WT	67	male	G4	Unmethylated	non-codel
TCGA-41-3915-01A	1	360	-3.92589	WT	48	male	G4	Methylated	non-codel
TCGA-41-4097-01A	1	6	-3.75641	WT	63	female	G4	Unmethylated	non-codel
TCGA-41-5651-01A	1	460	-4.95188	WT	59	female	G4	Methylated	non-codel
TCGA-76-4925-01A	1	146	-3.22041	WT	76	male	G4	Methylated	non-codel
TCGA-76-4926-01B	1	138	-3.42297	WT	68	male	G4	Unmethylated	non-codel
TCGA-76-4927-01A	1	535	-3.31596	WT	58	male	G4	Unmethylated	NA
TCGA-76-4928-01B	1	94	-2.82978	WT	85	female	G4	Methylated	non-codel
TCGA-76-4929-01A	1	111	-4.70373	WT	76	female	G4	Methylated	non-codel
TCGA-76-4931-01A	1	279	-3.90101	WT	70	female	G4	Unmethylated	non-codel
TCGA-76-4932-01A	1	1458	-3.65041	WT	50	female	G4	Methylated	NA
TCGA-CS-4938-01B	0	3574	-5.41667	Mutant	31	female	G2	Unmethylated	non-codel
TCGA-CS-4941-01A	1	234	-3.67524	WT	67	male	G3	Methylated	non-codel
TCGA-CS-4942-01A	1	1335	-5.20464	Mutant	44	female	G3	Unmethylated	non-codel
TCGA-CS-4943-01A	1	1106	-6.12995	Mutant	37	male	G3	Methylated	non-codel
TCGA-CS-4944-01A	0	1828	-6.56187	Mutant	50	male	G2	Methylated	non-codel
TCGA-CS-5393-01A	0	1222	-5.59922	Mutant	39	male	G3	Methylated	non-codel
TCGA-CS-5394-01A	0	8	-6.35059	Mutant	40	male	G3	Methylated	non-codel
TCGA-CS-5395-01A	1	639	-4.56751	WT	43	male	G2	Unmethylated	non-codel
TCGA-CS-5396-01A	0	1631	-5.88174	Mutant	53	female	G3	Methylated	codel
TCGA-CS-5397-01A	1	194	-4.52733	WT	54	female	G3	Unmethylated	non-codel
TCGA-CS-6186-01A	1	538	-4.67098	WT	58	male	G3	Unmethylated	non-codel
TCGA-CS-6188-01A	1	814	-3.89859	WT	48	male	G3	Unmethylated	non-codel
TCGA-CS-6290-01A	1	1137	-5.52344	Mutant	31	male	G3	Methylated	non-codel
TCGA-CS-6666-01A	0	1428	-5.01713	Mutant	22	male	G3	Methylated	non-codel
TCGA-CS-6667-01A	0	1469	-5.99084	Mutant	39	female	G2	Methylated	non-codel
TCGA-CS-6668-01A	0	1519	-5.43541	Mutant	57	female	G2	Methylated	codel
TCGA-CS-6669-01A	0	1494	-5.75372	WT	26	female	G2	Unmethylated	non-codel
TCGA-CS-6670-01A	0	1426	-5.76156	Mutant	43	male	G3	Methylated	codel
TCGA-DB-5270-01A	0	3733	-5.82817	Mutant	38	female	G3	Methylated	non-codel
TCGA-DB-5273-01A	0	2493	-5.52644	Mutant	33	male	G3	Unmethylated	non-codel
TCGA-DB-5274-01A	0	2289	-6.04328	Mutant	37	female	G3	Methylated	codel
TCGA-DB-5275-01A	0	1458	-6.3833	Mutant	36	male	G3	Methylated	non-codel
TCGA-DB-5277-01A	1	1547	-5.53153	Mutant	34	male	G3	Methylated	non-codel
TCGA-DB-5278-01A	0	2772	-6.08253	Mutant	17	male	G2	Methylated	codel
TCGA-DB-5279-01A	0	1354	-6.04055	Mutant	59	male	G2	Methylated	codel
TCGA-DB-5280-01A	0	1112	-5.86268	Mutant	43	male	G2	Methylated	non-codel
TCGA-DB-5281-01A	0	2381	-5.08345	Mutant	61	male	G3	Methylated	non-codel
TCGA-DB-A4X9-01A	0	1412	-4.99024	Mutant	33	female	G2	Methylated	non-codel
TCGA-DB-A4XA-01A	0	573	-5.71077	Mutant	30	male	G2	Methylated	codel
TCGA-DB-A4XB-01A	0	919	-5.41276	Mutant	38	male	G3	Methylated	non-codel
TCGA-DB-A4XC-01A	0	1421	-5.33545	Mutant	26	male	G2	Methylated	non-codel
TCGA-DB-A4XD-01A	0	1210	-5.44264	Mutant	32	male	G3	Methylated	non-codel
TCGA-DB-A4XE-01A	0	1139	-5.39708	Mutant	27	female	G3	Methylated	non-codel
TCGA-DB-A4XF-01A	0	1021	-5.47768	Mutant	41	female	G3	Methylated	non-codel
TCGA-DB-A4XG-01A	0	2219	-5.96313	Mutant	34	male	G3	Methylated	codel
TCGA-DB-A4XH-01A	0	962	-5.57093	Mutant	53	female	G2	Methylated	codel
TCGA-DB-A64L-01A	0	736	-5.61885	Mutant	67	female	G2	Methylated	codel
TCGA-DB-A64O-01A	1	775	-4.31282	WT	59	male	G2	Unmethylated	non-codel
TCGA-DB-A64P-01A	0	916	-5.89275	Mutant	40	male	G3	Methylated	codel
TCGA-DB-A64Q-01A	0	182	-6.11754	Mutant	31	female	G2	Methylated	codel
TCGA-DB-A64R-01A	0	955	-5.98668	Mutant	24	female	G2	Methylated	codel
TCGA-DB-A64S-01A	0	835	-5.32484	Mutant	20	male	G2	Unmethylated	non-codel
TCGA-DB-A64U-01A	0	846	-5.78668	Mutant	38	female	G2	Methylated	codel
TCGA-DB-A64V-01A	0	889	-5.30041	Mutant	54	male	G2	Methylated	codel
TCGA-DB-A64W-01A	1	438	-6.02541	Mutant	65	female	G3	Methylated	codel
TCGA-DB-A64X-01A	0	563	-5.59093	Mutant	56	female	G3	Methylated	non-codel
TCGA-DB-A75K-01A	0	368	-5.44657	Mutant	55	female	G3	Methylated	codel
TCGA-DB-A75L-01A	0	342	-5.98367	Mutant	36	female	G3	Methylated	non-codel
TCGA-DB-A75M-01A	0	544	-5.95273	Mutant	47	male	G2	Methylated	non-codel
TCGA-DB-A75O-01A	0	935	-5.73859	Mutant	29	male	G3	Methylated	non-codel
TCGA-DB-A75P-01A	0	492	-4.77125	WT	25	female	G2	Unmethylated	non-codel
TCGA-DH-5140-01A	1	607	-5.67146	WT	38	female	G3	Unmethylated	non-codel
TCGA-DH-5141-01A	0	968	-5.80803	Mutant	32	male	G3	Methylated	codel
TCGA-DH-5142-01A	0	1943	-5.43166	Mutant	29	male	G3	Methylated	non-codel
TCGA-DH-5143-01A	0	1401	-5.78222	Mutant	30	male	G3	Methylated	non-codel
TCGA-DH-5144-01A	0	748	-5.60398	Mutant	56	female	G3	Methylated	codel
TCGA-DH-A669-02A	1	919	-5.96939	Mutant	70	male	G3	Methylated	codel
TCGA-DH-A669-01A	1	919	-4.95608	Mutant	70	male	G3	Methylated	codel
TCGA-DH-A66B-01A	0	1279	-5.09979	Mutant	52	male	G3	Methylated	non-codel
TCGA-DH-A66D-01A	0	846	-4.87147	Mutant	43	female	G3	Methylated	non-codel
TCGA-DH-A66F-01A	0	523	-6.16239	Mutant	49	male	G2	Methylated	codel
TCGA-DH-A66G-01A	0	523	-4.8254	Mutant	49	female	G3	Methylated	non-codel
TCGA-DH-A7UR-01A	0	1650	-5.7663	Mutant	59	female	G3	Methylated	codel
TCGA-DH-A7US-01A	0	706	-5.84986	Mutant	50	male	G2	Methylated	codel
TCGA-DH-A7UT-01A	1	531	-5.65381	Mutant	30	male	G3	Methylated	non-codel
TCGA-DH-A7UU-01A	0	417	-5.97756	Mutant	43	male	G3	Methylated	non-codel
TCGA-DH-A7UV-01A	0	566	-5.67689	Mutant	49	male	G3	Methylated	non-codel
TCGA-DU-5847-01A	0	548	-3.92367	WT	34	female	G3	Methylated	non-codel
TCGA-DU-5849-01A	0	443	-5.44004	Mutant	48	male	G2	Methylated	codel
TCGA-DU-5852-01A	1	205	-4.88883	WT	61	female	G3	Methylated	non-codel
TCGA-DU-5853-01A	0	407	-5.68279	Mutant	29	male	G2	Methylated	non-codel
TCGA-DU-5854-01A	0	257	-4.01357	WT	57	female	G3	Unmethylated	non-codel
TCGA-DU-5855-01A	0	207	-5.6612	Mutant	49	female	G3	Methylated	non-codel
TCGA-DU-5870-01A	0	5546	-5.71165	Mutant	34	female	G2	Methylated	codel
TCGA-DU-5870-02A	0	5546	-6.26754	Mutant	34	female	G2	Methylated	codel
TCGA-DU-5871-01A	0	576	-6.13847	Mutant	37	female	G2	Methylated	non-codel
TCGA-DU-5872-02A	0	532	-4.1407	Mutant	43	female	G2	Methylated	non-codel
TCGA-DU-5872-01A	0	532	-5.88792	Mutant	43	female	G2	Methylated	non-codel
TCGA-DU-5874-01A	0	461	-5.94658	Mutant	62	female	G2	Methylated	codel
TCGA-DU-6392-01A	0	6423	-4.96383	WT	35	female	G3	Unmethylated	non-codel
TCGA-DU-6393-01A	1	1585	-6.14554	Mutant	66	male	G3	Methylated	codel
TCGA-DU-6394-01A	1	682	-5.72434	Mutant	53	male	G3	Methylated	codel
TCGA-DU-6395-01A	1	1491	-5.46888	Mutant	31	male	G2	Methylated	non-codel
TCGA-DU-6396-01A	1	2286	-5.35416	Mutant	31	female	G3	Methylated	non-codel
TCGA-DU-6397-02A	1	1401	-5.45483	Mutant	45	male	G3	Methylated	codel
TCGA-DU-6397-01A	1	1401	-5.84098	Mutant	45	male	G3	Methylated	codel
TCGA-DU-6399-01A	1	2000	-5.90049	Mutant	54	male	G2	Methylated	non-codel
TCGA-DU-6400-01A	1	37	-5.93815	Mutant	66	female	G2	Methylated	codel
TCGA-DU-6401-01A	1	2660	-6.40186	Mutant	31	female	G2	Methylated	non-codel
TCGA-DU-6402-01A	1	214	-2.99616	WT	52	male	G3	Unmethylated	non-codel
TCGA-DU-6403-01A	1	354	-4.56501	WT	60	female	G3	Unmethylated	non-codel
TCGA-DU-6404-02B	1	4068	-5.65701	WT	24	female	G3	Unmethylated	non-codel
TCGA-DU-6404-01A	1	4068	-4.74249	WT	24	female	G3	Unmethylated	non-codel
TCGA-DU-6404-02A	1	4068	-4.956	WT	24	female	G3	Unmethylated	non-codel
TCGA-DU-6405-01A	1	605	-4.06601	WT	51	female	G3	Methylated	non-codel
TCGA-DU-6406-01A	1	512	-3.93829	WT	59	female	G3	Unmethylated	non-codel
TCGA-DU-6407-02A	1	2875	-4.95645	Mutant	35	female	G2	Methylated	non-codel
TCGA-DU-6407-01A	1	2875	-4.84761	Mutant	35	female	G2	Methylated	non-codel
TCGA-DU-6407-02B	1	2875	-4.25014	Mutant	35	female	G2	Methylated	non-codel
TCGA-DU-6408-01A	1	3470	-5.29365	Mutant	23	female	G3	Methylated	non-codel
TCGA-DU-6410-01A	0	242	-5.51724	Mutant	56	male	G3	Methylated	codel
TCGA-DU-6542-01A	1	73	-5.01902	Mutant	25	male	G3	Methylated	non-codel
TCGA-DU-7006-01A	1	349	-3.57076	WT	60	female	G3	Methylated	non-codel
TCGA-DU-7007-01A	1	1915	-5.20218	Mutant	33	male	G2	Methylated	non-codel
TCGA-DU-7008-01A	0	4752	-5.65856	Mutant	41	female	G2	Methylated	non-codel
TCGA-DU-7009-01A	1	4695	-6.12575	Mutant	32	female	G2	Methylated	codel
TCGA-DU-7010-01A	1	456	-5.72424	Mutant	58	female	G3	Methylated	non-codel
TCGA-DU-7011-01A	1	3200	-4.85195	Mutant	25	male	G2	Unmethylated	non-codel
TCGA-DU-7012-01A	1	199	-3.21237	WT	74	female	G3	Methylated	non-codel
TCGA-DU-7013-01A	1	269	-3.2287	WT	59	male	G3	Unmethylated	non-codel
TCGA-DU-7014-01A	1	3571	-5.4911	NA	59	male	G2	Methylated	non-codel
TCGA-DU-7015-01A	0	2761	-4.8592	Mutant	41	female	G2	Methylated	non-codel
TCGA-DU-7018-01A	1	933	-6.00177	Mutant	57	female	G3	Methylated	codel
TCGA-DU-7019-01A	0	800	-5.84443	Mutant	39	male	G3	Methylated	non-codel
TCGA-DU-7290-01A	1	315	-4.21386	WT	45	female	G3	Unmethylated	non-codel
TCGA-DU-7292-01A	1	242	-4.07781	WT	69	male	G3	Methylated	non-codel
TCGA-DU-7294-01A	0	2869	-6.09097	Mutant	53	female	G2	Methylated	codel
TCGA-DU-7298-01A	1	576	-5.38002	Mutant	38	female	G3	Methylated	non-codel
TCGA-DU-7299-01A	1	1339	-5.89242	Mutant	33	male	G3	Methylated	non-codel
TCGA-DU-7300-01A	1	1886	-5.19548	Mutant	53	female	G3	Methylated	codel
TCGA-DU-7301-01A	1	788	-5.33061	Mutant	53	male	G2	Methylated	non-codel
TCGA-DU-7302-01A	0	1834	-5.75583	Mutant	48	female	G3	Methylated	codel
TCGA-DU-7304-01A	1	709	-5.90685	Mutant	43	male	G3	Methylated	non-codel
TCGA-DU-7304-02A	1	709	-6.19983	Mutant	43	male	G3	Methylated	non-codel
TCGA-DU-7306-01A	0	1277	-5.28064	Mutant	67	male	G2	Methylated	non-codel
TCGA-DU-7309-01A	0	84	-6.02907	Mutant	41	female	G3	Methylated	non-codel
TCGA-DU-8158-01A	1	155	-4.09229	WT	57	female	G3	Unmethylated	non-codel
TCGA-DU-8161-01A	1	722	-3.6685	WT	63	female	G3	Unmethylated	non-codel
TCGA-DU-8162-01A	1	444	-5.20413	WT	61	female	G3	Unmethylated	non-codel
TCGA-DU-8163-01A	0	629	-5.16721	Mutant	29	male	G3	Unmethylated	non-codel
TCGA-DU-8164-01A	0	651	-5.57544	Mutant	51	male	G2	Methylated	codel
TCGA-DU-8165-01A	0	582	-3.32503	WT	60	female	G3	Unmethylated	non-codel
TCGA-DU-8166-01A	0	516	-5.48821	Mutant	29	female	G2	Methylated	non-codel
TCGA-DU-8167-01A	0	471	-5.4277	Mutant	69	female	G2	Methylated	non-codel
TCGA-DU-8168-01A	0	431	-5.99401	Mutant	55	female	G3	Methylated	codel
TCGA-DU-A5TP-01A	0	1012	-4.94535	Mutant	33	male	G3	Methylated	non-codel
TCGA-DU-A5TR-01A	0	908	-4.49049	Mutant	51	male	G2	Methylated	non-codel
TCGA-DU-A5TS-01A	0	964	-5.25146	Mutant	42	male	G2	Methylated	non-codel
TCGA-DU-A5TT-01A	0	743	-3.64987	WT	70	male	G3	Methylated	non-codel
TCGA-DU-A5TU-01A	0	796	-4.9316	Mutant	62	female	G2	Methylated	non-codel
TCGA-DU-A5TW-01A	0	760	-4.87372	Mutant	33	female	G3	Methylated	non-codel
TCGA-DU-A5TY-01A	1	1033	-3.50607	WT	46	female	G3	Methylated	non-codel
TCGA-DU-A6S2-01A	0	777	-5.59643	Mutant	37	female	G2	Methylated	codel
TCGA-DU-A6S3-01A	0	656	-6.27932	Mutant	60	male	G2	Methylated	codel
TCGA-DU-A6S6-01A	0	2893	-5.81058	Mutant	35	female	G2	Methylated	codel
TCGA-DU-A6S7-01A	0	638	-5.75187	Mutant	27	female	G3	Methylated	non-codel
TCGA-DU-A6S8-01A	0	678	-5.84235	Mutant	74	female	G3	Methylated	codel
TCGA-DU-A76K-01A	1	347	-5.00179	WT	87	male	G2	Unmethylated	non-codel
TCGA-DU-A76L-01A	1	814	-4.07859	WT	54	male	G3	Methylated	non-codel
TCGA-DU-A76O-01A	0	522	-5.88206	Mutant	30	male	G2	Methylated	non-codel
TCGA-DU-A76R-01A	1	648	-6.08221	Mutant	51	male	G3	Methylated	codel
TCGA-DU-A7T6-01A	1	547	-5.94341	Mutant	73	female	G3	Methylated	codel
TCGA-DU-A7T8-01A	1	4229	-5.54405	Mutant	35	male	G3	Methylated	non-codel
TCGA-DU-A7TA-01A	0	2565	-5.78169	Mutant	32	male	G2	Methylated	non-codel
TCGA-DU-A7TB-01A	0	1567	-4.30927	WT	56	male	G2	Unmethylated	non-codel
TCGA-DU-A7TC-01A	0	1137	-5.82718	Mutant	32	male	G2	Methylated	non-codel
TCGA-DU-A7TD-01A	1	228	-3.09887	WT	52	male	G3	Unmethylated	non-codel
TCGA-DU-A7TG-01A	1	1351	-5.51892	Mutant	40	male	G2	Methylated	non-codel
TCGA-DU-A7TI-01A	1	1183	-5.59086	NA	NA	NA	NA	Methylated	non-codel
TCGA-DU-A7TJ-01A	0	17	-4.31415	WT	55	male	G3	Methylated	non-codel
TCGA-E1-5302-01A	1	1525	-5.79699	Mutant	41	male	G3	Methylated	non-codel
TCGA-E1-5303-01A	1	2052	-5.61926	Mutant	38	male	G3	Methylated	non-codel
TCGA-E1-5304-01A	1	1251	-5.98419	Mutant	42	male	G3	Unmethylated	non-codel
TCGA-E1-5305-01A	1	2433	-5.11167	Mutant	34	male	G3	Methylated	non-codel
TCGA-E1-5307-01A	1	1762	-6.16029	Mutant	62	female	G3	Methylated	non-codel
TCGA-E1-5311-01A	1	4084	-5.94883	Mutant	31	male	G3	Methylated	codel
TCGA-E1-5318-01A	1	2379	-6.43891	Mutant	42	female	G2	Methylated	codel
TCGA-E1-5319-01A	1	2907	-5.99793	Mutant	48	female	G2	Methylated	codel
TCGA-E1-5322-01A	1	3978	-4.9292	Mutant	38	female	G2	Methylated	non-codel
TCGA-E1-A7YD-01A	1	435	-4.63668	WT	NA	NA	NA	Unmethylated	non-codel
TCGA-E1-A7YE-01A	1	886	-5.13241	Mutant	NA	NA	NA	Unmethylated	non-codel
TCGA-E1-A7YH-01A	1	2835	-5.77667	Mutant	NA	NA	NA	Methylated	non-codel
TCGA-E1-A7YI-01A	1	111	-6.18746	Mutant	NA	NA	NA	Methylated	non-codel
TCGA-E1-A7YJ-01A	1	592	-4.45396	WT	NA	NA	NA	Unmethylated	non-codel
TCGA-E1-A7YK-01A	1	378	-5.05677	Mutant	NA	NA	NA	Methylated	non-codel
TCGA-E1-A7YL-01A	1	492	-3.56558	WT	NA	NA	NA	Unmethylated	non-codel
TCGA-E1-A7YM-01A	1	648	-4.91228	WT	NA	NA	NA	Unmethylated	non-codel
TCGA-E1-A7YN-01A	1	727	-3.38237	WT	NA	NA	NA	Methylated	non-codel
TCGA-E1-A7YO-01A	1	2282	-5.45466	Mutant	45	male	G3	Methylated	codel
TCGA-E1-A7YQ-01A	1	1578	-4.02194	WT	NA	NA	NA	Unmethylated	non-codel
TCGA-E1-A7YS-01A	1	466	-6.13845	Mutant	NA	NA	NA	Methylated	codel
TCGA-E1-A7YU-01A	1	23	-5.79969	Mutant	NA	NA	NA	Methylated	non-codel
TCGA-E1-A7YV-01A	1	987	-6.40433	Mutant	26	female	G3	Methylated	non-codel
TCGA-E1-A7YW-01A	1	1120	-6.08742	Mutant	28	male	G2	Methylated	non-codel
TCGA-E1-A7YY-01A	1	4445	-5.5562	Mutant	NA	NA	NA	Methylated	non-codel
TCGA-E1-A7Z2-01A	1	398	-6.12366	WT	NA	NA	NA	Unmethylated	non-codel
TCGA-E1-A7Z3-01A	1	2235	-5.66124	Mutant	NA	NA	NA	Methylated	non-codel
TCGA-E1-A7Z4-01A	1	4412	-5.96238	Mutant	NA	NA	NA	Methylated	non-codel
TCGA-E1-A7Z6-01A	1	984	-5.81948	Mutant	41	female	G2	Methylated	non-codel
TCGA-EZ-7264-01A	0	1201	-5.78591	Mutant	47	female	G2	Methylated	codel
TCGA-F6-A8O3-01A	0	7	-6.41811	Mutant	34	male	G2	Methylated	codel
TCGA-F6-A8O4-01A	0	6	-6.00928	Mutant	44	male	G2	Methylated	non-codel
TCGA-FG-5962-01B	0	1453	-5.80802	Mutant	54	male	G3	Methylated	codel
TCGA-FG-5963-01A	1	775	-4.87614	WT	23	male	G3	Unmethylated	non-codel
TCGA-FG-5963-02A	1	775	-5.29127	WT	23	male	G3	Unmethylated	non-codel
TCGA-FG-5964-01A	0	1588	-5.32522	Mutant	62	male	G2	Methylated	codel
TCGA-FG-5965-02B	1	1120	-6.08239	Mutant	39	female	G2	Methylated	non-codel
TCGA-FG-5965-02A	1	1120	-5.26738	Mutant	39	female	G2	Methylated	non-codel
TCGA-FG-5965-01B	1	1120	-5.43551	Mutant	39	female	G2	Methylated	non-codel
TCGA-FG-6688-01A	0	571	-3.75768	WT	59	female	G3	Methylated	non-codel
TCGA-FG-6689-01A	0	454	-5.96742	Mutant	30	male	G2	Methylated	non-codel
TCGA-FG-6690-01A	0	1294	-5.80326	Mutant	70	male	G2	Methylated	non-codel
TCGA-FG-6691-01A	0	1257	-5.13876	Mutant	23	female	G2	Unmethylated	non-codel
TCGA-FG-6692-01A	1	561	-4.20918	WT	63	male	G3	Methylated	non-codel
TCGA-FG-7634-01A	0	467	-5.17486	Mutant	28	male	G2	Methylated	codel
TCGA-FG-7636-01A	0	544	-5.8019	Mutant	48	male	G3	Methylated	non-codel
TCGA-FG-7637-01A	0	1219	-5.80419	Mutant	49	male	G2	Methylated	non-codel
TCGA-FG-7638-01B	0	686	-5.48418	Mutant	31	female	G3	Methylated	codel
TCGA-FG-7641-01B	0	627	-6.05784	Mutant	31	male	G2	Methylated	codel
TCGA-FG-7643-01A	0	611	-5.03484	WT	49	female	G2	Methylated	non-codel
TCGA-FG-8181-01A	0	862	-5.43772	WT	23	male	G3	Unmethylated	non-codel
TCGA-FG-8182-01A	0	416	-5.20422	Mutant	35	male	G2	Methylated	non-codel
TCGA-FG-8185-01A	0	433	-6.04436	Mutant	37	male	G3	Methylated	non-codel
TCGA-FG-8186-01A	0	487	-5.17464	Mutant	42	female	G3	Methylated	codel
TCGA-FG-8187-01A	0	611	-5.79354	Mutant	31	male	G2	Methylated	codel
TCGA-FG-8188-01A	0	455	-5.84273	Mutant	41	male	G2	Methylated	non-codel
TCGA-FG-8189-01B	0	685	-5.39205	Mutant	33	female	G2	Methylated	non-codel
TCGA-FG-8191-01A	0	992	-5.71229	Mutant	30	male	G3	Unmethylated	non-codel
TCGA-FG-A4MT-02A	0	1164	-5.78326	Mutant	27	female	G2	Methylated	non-codel
TCGA-FG-A4MT-01A	0	1164	-5.64026	Mutant	27	female	G2	Methylated	non-codel
TCGA-FG-A4MU-01B	0	326	-3.78598	WT	58	male	G3	Methylated	non-codel
TCGA-FG-A4MW-01A	1	559	-4.21608	WT	63	male	G3	Methylated	non-codel
TCGA-FG-A4MX-01A	0	569	-5.38173	Mutant	47	male	G2	Methylated	non-codel
TCGA-FG-A4MY-01A	0	721	-5.51253	Mutant	44	female	G2	Methylated	non-codel
TCGA-FG-A60J-01A	0	449	-5.97246	Mutant	47	female	G2	Methylated	non-codel
TCGA-FG-A60K-01A	0	542	-5.49912	Mutant	34	female	G2	Methylated	codel
TCGA-FG-A60L-01A	0	655	-5.69598	Mutant	34	female	G2	Methylated	non-codel
TCGA-FG-A6IZ-01A	0	457	-5.99314	Mutant	60	male	G2	Methylated	codel
TCGA-FG-A6J1-01A	0	500	-6.13795	Mutant	44	female	G2	Methylated	codel
TCGA-FG-A6J3-01A	0	677	-4.69819	Mutant	52	female	G3	Methylated	non-codel
TCGA-FG-A70Y-01A	0	868	-5.74283	Mutant	20	female	G2	Methylated	non-codel
TCGA-FG-A70Z-01A	0	328	-4.5295	WT	53	female	G3	Methylated	non-codel
TCGA-FG-A710-01A	0	1115	-5.73523	Mutant	50	female	G2	Methylated	codel
TCGA-FG-A711-01A	1	1481	-5.95056	Mutant	33	female	G2	Unmethylated	non-codel
TCGA-FG-A713-01A	0	622	-5.85354	Mutant	74	female	G2	Methylated	codel
TCGA-FG-A87N-01A	0	567	-5.49667	Mutant	37	female	G3	Methylated	non-codel
TCGA-FG-A87Q-01A	0	174	-5.0517	WT	61	female	G3	Methylated	non-codel
TCGA-FN-7833-01A	0	837	-5.29852	Mutant	25	male	G3	Methylated	non-codel
TCGA-HT-7467-01A	0	3	-5.31056	Mutant	54	male	G2	Methylated	codel
TCGA-HT-7468-01A	0	203	-5.71412	Mutant	30	male	G3	Methylated	codel
TCGA-HT-7469-01A	1	351	-4.45832	WT	30	male	G3	Methylated	non-codel
TCGA-HT-7470-01A	1	1220	-5.86773	Mutant	37	male	G3	Methylated	non-codel
TCGA-HT-7471-01A	0	4	-5.53321	Mutant	37	female	G3	Methylated	codel
TCGA-HT-7472-01A	0	1	-5.94038	Mutant	38	male	G2	Methylated	non-codel
TCGA-HT-7473-01A	0	503	-4.60854	Mutant	28	male	G2	Unmethylated	non-codel
TCGA-HT-7474-01A	0	114	-5.58143	Mutant	52	male	G2	Methylated	non-codel
TCGA-HT-7475-01A	0	530	-4.68823	Mutant	67	male	G3	Methylated	non-codel
TCGA-HT-7476-01A	0	199	-5.58693	Mutant	26	male	G2	Methylated	non-codel
TCGA-HT-7477-01B	0	738	-5.17527	Mutant	62	male	G3	Methylated	non-codel
TCGA-HT-7478-01A	0	194	-5.26919	Mutant	36	male	G2	Unmethylated	non-codel
TCGA-HT-7479-01A	0	1227	-5.37094	Mutant	44	male	G3	Methylated	non-codel
TCGA-HT-7480-01A	0	2287	-5.39928	Mutant	33	male	G2	Methylated	codel
TCGA-HT-7481-01A	0	2918	-6.11472	Mutant	39	male	G2	Methylated	codel
TCGA-HT-7482-01A	0	3253	-6.01728	Mutant	18	female	G2	Methylated	non-codel
TCGA-HT-7483-01A	0	5255	-5.9008	Mutant	14	male	G2	Unmethylated	non-codel
TCGA-HT-7485-01A	0	122	-5.76666	Mutant	42	male	G2	Methylated	non-codel
TCGA-HT-7601-01A	0	153	-5.13434	Mutant	30	female	G3	Methylated	non-codel
TCGA-HT-7602-01A	0	908	-5.46305	Mutant	21	male	G2	Methylated	non-codel
TCGA-HT-7603-01A	0	705	-6.38808	Mutant	29	male	G2	Methylated	non-codel
TCGA-HT-7604-01A	0	3725	-5.56509	Mutant	50	male	G2	Methylated	non-codel
TCGA-HT-7605-01A	0	139	-5.87094	Mutant	38	male	G2	Methylated	codel
TCGA-HT-7606-01A	0	526	-6.21099	Mutant	30	female	G2	Unmethylated	non-codel
TCGA-HT-7607-01A	1	96	-5.52245	Mutant	61	female	G2	Methylated	codel
TCGA-HT-7608-01A	0	671	-5.63174	Mutant	61	male	G2	Methylated	codel
TCGA-HT-7609-01A	0	1399	-6.03022	Mutant	34	male	G3	Methylated	non-codel
TCGA-HT-7610-01A	0	1706	-5.65477	Mutant	25	female	G2	Methylated	non-codel
TCGA-HT-7611-01A	0	1752	-5.29011	Mutant	36	male	G2	Methylated	non-codel
TCGA-HT-7616-01A	1	7	-5.69009	Mutant	75	male	G3	Methylated	codel
TCGA-HT-7620-01A	0	434	-5.75302	Mutant	40	male	G3	Methylated	codel
TCGA-HT-7676-01A	0	5	-5.84932	Mutant	26	male	G2	Unmethylated	non-codel
TCGA-HT-7677-01A	0	494	-5.50654	Mutant	53	male	G3	Methylated	codel
TCGA-HT-7680-01A	0	23	-4.94095	WT	32	female	G2	Unmethylated	non-codel
TCGA-HT-7681-01A	0	1359	-6.04138	Mutant	29	female	G2	Methylated	codel
TCGA-HT-7684-01A	0	184	-6.7878	Mutant	58	male	G3	Methylated	non-codel
TCGA-HT-7686-01A	0	1300	-5.02661	Mutant	29	female	G3	Methylated	non-codel
TCGA-HT-7687-01A	0	3	-5.39281	Mutant	74	male	G3	Methylated	codel
TCGA-HT-7688-01A	0	964	-5.6778	Mutant	59	male	G3	Methylated	non-codel
TCGA-HT-7689-01A	0	455	-6.0342	Mutant	58	female	G2	Methylated	non-codel
TCGA-HT-7690-01A	0	3	-5.49462	Mutant	29	male	G3	Methylated	non-codel
TCGA-HT-7691-01A	0	3	-5.2503	WT	31	female	G2	Unmethylated	non-codel
TCGA-HT-7692-01A	0	90	-6.25622	Mutant	43	male	G2	Methylated	codel
TCGA-HT-7693-01A	0	533	-6.69972	Mutant	51	female	G2	Methylated	non-codel
TCGA-HT-7694-01A	0	210	-5.86846	Mutant	60	male	G3	Methylated	codel
TCGA-HT-7695-01A	0	442	-5.45713	Mutant	29	female	G2	Methylated	codel
TCGA-HT-7854-01A	0	1201	-4.46197	WT	62	male	G2	Unmethylated	non-codel
TCGA-HT-7855-01A	0	585	-5.92601	Mutant	39	male	G3	Methylated	non-codel
TCGA-HT-7856-01A	0	1189	-5.76982	Mutant	35	male	G3	Methylated	codel
TCGA-HT-7857-01A	0	7	-3.83674	WT	24	female	G3	Unmethylated	non-codel
TCGA-HT-7858-01A	0	1540	-5.58404	Mutant	28	male	G2	Methylated	non-codel
TCGA-HT-7860-01A	0	15	-3.99101	WT	60	female	G3	Methylated	non-codel
TCGA-HT-7873-01B	0	718	-6.13508	Mutant	29	male	G2	Methylated	non-codel
TCGA-HT-7874-01A	0	1130	-5.59978	Mutant	41	female	G3	Methylated	codel
TCGA-HT-7875-01A	0	10	-5.60431	Mutant	56	male	G2	Methylated	codel
TCGA-HT-7877-01A	0	4	-5.57687	Mutant	20	female	G2	Methylated	codel
TCGA-HT-7879-01A	0	112	-5.13761	Mutant	31	male	G3	Methylated	non-codel
TCGA-HT-7880-01A	0	162	-5.52536	Mutant	30	male	G2	Methylated	non-codel
TCGA-HT-7881-01A	0	1079	-5.69453	Mutant	38	male	G2	Methylated	codel
TCGA-HT-7882-01A	1	113	-3.52849	WT	66	male	G3	Methylated	non-codel
TCGA-HT-7884-01B	0	343	-5.86172	Mutant	44	female	G2	Methylated	non-codel
TCGA-HT-7902-01A	0	956	-5.66809	Mutant	30	female	G2	Methylated	non-codel
TCGA-HT-8010-01A	0	50	-5.46922	Mutant	64	female	G2	Methylated	codel
TCGA-HT-8011-01A	0	494	-4.23524	WT	55	male	G3	Unmethylated	non-codel
TCGA-HT-8012-01A	0	286	-5.74154	Mutant	30	female	G2	Methylated	codel
TCGA-HT-8013-01A	1	1933	-4.97098	Mutant	37	female	G2	Methylated	non-codel
TCGA-HT-8015-01B	0	3	-5.20578	WT	21	male	G2	Unmethylated	non-codel
TCGA-HT-8018-01A	1	1152	-4.88912	Mutant	40	female	G2	Methylated	non-codel
TCGA-HT-8019-01A	0	1004	-5.27821	WT	34	female	G3	Unmethylated	non-codel
TCGA-HT-8104-01A	0	372	-3.90983	WT	51	female	G3	Unmethylated	non-codel
TCGA-HT-8105-01A	0	190	-5.36735	Mutant	54	male	G3	Methylated	codel
TCGA-HT-8107-01A	0	14	-5.68646	WT	62	male	G2	Methylated	non-codel
TCGA-HT-8108-01A	0	76	-4.79365	Mutant	26	female	G2	Methylated	non-codel
TCGA-HT-8109-01A	0	169	-5.48064	Mutant	64	male	G3	Methylated	codel
TCGA-HT-8110-01A	0	419	-3.6323	WT	57	male	G3	Methylated	non-codel
TCGA-HT-8111-01A	0	7	-5.0329	Mutant	32	male	G3	Methylated	non-codel
TCGA-HT-8113-01A	0	900	-5.74066	Mutant	49	female	G2	Methylated	non-codel
TCGA-HT-8114-01A	0	1040	-5.15629	Mutant	36	male	G3	Methylated	non-codel
TCGA-HT-8558-01A	0	418	-5.47849	WT	29	female	G2	Unmethylated	non-codel
TCGA-HT-8563-01A	0	860	-4.29719	Mutant	30	female	G3	Unmethylated	non-codel
TCGA-HT-8564-01A	0	478	-4.78538	WT	47	male	G3	Unmethylated	non-codel
TCGA-HT-A4DS-01A	0	7	-3.35097	WT	55	female	G3	Unmethylated	non-codel
TCGA-HT-A4DV-01A	0	792	-5.84565	Mutant	51	female	G3	Methylated	codel
TCGA-HT-A5R5-01A	0	4	-5.13216	Mutant	33	female	G2	Methylated	non-codel
TCGA-HT-A5R7-01A	0	615	-5.48111	Mutant	33	female	G3	Methylated	non-codel
TCGA-HT-A5R9-01A	0	2	-5.13859	Mutant	48	female	G3	Methylated	codel
TCGA-HT-A5RA-01A	0	832	-3.93176	WT	65	female	G3	Unmethylated	non-codel
TCGA-HT-A5RB-01A	0	3	-5.49836	Mutant	24	male	G2	Methylated	non-codel
TCGA-HT-A5RC-01A	1	162	-3.06634	WT	70	female	G3	Unmethylated	non-codel
TCGA-HT-A614-01A	0	82	-5.02904	Mutant	47	male	G2	Methylated	non-codel
TCGA-HT-A615-01A	0	515	-5.55332	Mutant	38	female	G2	Methylated	codel
TCGA-HT-A616-01A	0	55	-5.47556	Mutant	36	female	G2	Methylated	non-codel
TCGA-HT-A617-01A	0	491	-4.38605	WT	47	male	G2	Unmethylated	non-codel
TCGA-HT-A618-01A	0	512	-5.24846	Mutant	37	female	G3	Methylated	non-codel
TCGA-HT-A619-01A	0	651	-5.29898	Mutant	51	female	G3	Methylated	codel
TCGA-HT-A61A-01A	0	194	-5.83703	Mutant	20	female	G2	Methylated	non-codel
TCGA-HT-A61B-01A	0	533	-4.90069	Mutant	NA	NA	NA	Methylated	non-codel
TCGA-HT-A61C-01A	1	537	-4.38228	WT	66	male	G3	Unmethylated	non-codel
TCGA-HT-A74H-01A	0	74	-3.8503	WT	62	male	G3	Unmethylated	non-codel
TCGA-HT-A74J-01A	0	320	-5.51326	Mutant	33	male	G2	Unmethylated	non-codel
TCGA-HT-A74K-01A	0	467	-6.32345	Mutant	NA	NA	NA	Methylated	codel
TCGA-HT-A74L-01A	0	336	-5.63879	Mutant	NA	NA	NA	Methylated	codel
TCGA-HT-A74O-01A	0	3	-4.78501	Mutant	34	male	G3	Methylated	non-codel
TCGA-HW-7486-01A	0	1721	-6.06952	Mutant	37	male	G2	Methylated	codel
TCGA-HW-7487-01A	0	1382	-5.77535	Mutant	39	male	G2	Methylated	codel
TCGA-HW-7489-01A	1	1262	-6.0182	Mutant	38	male	G2	Methylated	non-codel
TCGA-HW-7490-01A	0	1387	-6.49006	Mutant	41	male	G2	Methylated	non-codel
TCGA-HW-7491-01A	0	2078	-6.43673	Mutant	35	male	G2	Unmethylated	codel
TCGA-HW-7493-01A	0	2107	-5.42473	NA	40	female	G2	Methylated	non-codel
TCGA-HW-7495-01A	0	1078	-5.85828	Mutant	45	female	G2	Methylated	codel
TCGA-HW-8319-01A	1	1209	-6.06428	Mutant	34	female	G3	Unmethylated	non-codel
TCGA-HW-8320-01A	0	1217	-5.60511	Mutant	36	male	G3	Methylated	non-codel
TCGA-HW-8321-01A	0	1294	-5.7161	Mutant	31	male	G3	Methylated	non-codel
TCGA-HW-8322-01A	0	758	-5.12592	Mutant	39	male	G2	Methylated	codel
TCGA-HW-A5KJ-01A	1	962	-5.80309	Mutant	68	male	G3	Methylated	codel
TCGA-HW-A5KK-01A	1	388	-4.23878	WT	64	male	G3	Methylated	non-codel
TCGA-HW-A5KL-01A	0	878	-5.54561	Mutant	42	female	G2	Methylated	non-codel
TCGA-HW-A5KM-01A	0	630	-4.58597	Mutant	35	male	G2	Methylated	non-codel
TCGA-IK-7675-01A	1	578	-5.79179	Mutant	43	male	G2	Methylated	non-codel
TCGA-IK-8125-01A	0	1301	-5.21185	Mutant	62	male	G3	Methylated	codel
TCGA-KT-A74X-01A	0	438	-6.02796	Mutant	26	male	G3	Methylated	codel
TCGA-KT-A7W1-01A	0	438	-3.66984	WT	45	female	G3	Methylated	non-codel
TCGA-P5-A5EV-01A	0	7	-5.40056	Mutant	39	male	G2	Methylated	non-codel
TCGA-P5-A5EW-01A	0	204	-5.95157	Mutant	20	female	G2	Methylated	non-codel
TCGA-P5-A5EX-01A	0	243	-4.98639	Mutant	41	female	G3	Methylated	codel
TCGA-P5-A5EY-01A	0	72	-4.61308	WT	21	male	G2	Unmethylated	non-codel
TCGA-P5-A5EZ-01A	0	70	-5.05276	Mutant	39	male	G3	Methylated	non-codel
TCGA-P5-A5F0-01A	0	287	-5.06969	Mutant	33	male	G2	Methylated	codel
TCGA-P5-A5F1-01A	0	179	-5.09174	Mutant	30	male	G2	Unmethylated	non-codel
TCGA-P5-A5F2-01A	0	242	-6.16318	Mutant	36	female	G2	Methylated	non-codel
TCGA-P5-A5F4-01A	0	231	-5.86866	Mutant	35	female	G3	Methylated	non-codel
TCGA-P5-A5F6-01A	0	39	-6.03497	WT	26	male	G2	Unmethylated	non-codel
TCGA-P5-A72U-01A	0	7	-3.82297	WT	71	female	G3	Methylated	non-codel
TCGA-P5-A72W-01A	0	317	-5.12713	Mutant	35	male	G3	Unmethylated	non-codel
TCGA-P5-A72X-01A	0	403	-5.75597	Mutant	21	male	G3	Methylated	non-codel
TCGA-P5-A72Z-01A	0	354	-5.46172	Mutant	64	female	G3	Methylated	codel
TCGA-P5-A730-01A	0	333	-5.91319	Mutant	22	male	G3	Methylated	codel
TCGA-P5-A731-01A	0	274	-5.12031	Mutant	59	female	G2	Methylated	non-codel
TCGA-P5-A733-01A	0	414	-5.6095	Mutant	52	female	G2	Methylated	non-codel
TCGA-P5-A735-01A	0	292	-6.63864	Mutant	NA	NA	NA	Methylated	non-codel
TCGA-P5-A736-01A	0	230	-4.83099	Mutant	NA	NA	NA	Methylated	non-codel
TCGA-P5-A737-01A	0	372	-6.09769	Mutant	NA	NA	NA	Methylated	codel
TCGA-P5-A77W-01A	0	584	-6.18511	Mutant	NA	NA	NA	Methylated	codel
TCGA-P5-A77X-01A	0	105	-5.95084	Mutant	NA	NA	NA	Methylated	codel
TCGA-P5-A780-01A	0	72	-5.64148	Mutant	NA	NA	NA	Methylated	non-codel
TCGA-P5-A781-01A	0	134	-6.17813	Mutant	NA	NA	NA	Methylated	codel
TCGA-QH-A65R-01A	0	461	-6.15621	Mutant	38	female	G3	Methylated	codel
TCGA-QH-A65S-01A	0	77	-6.18835	Mutant	32	female	G2	Methylated	non-codel
TCGA-QH-A65V-01A	0	384	-6.07992	Mutant	43	female	G2	Methylated	codel
TCGA-QH-A65X-01A	0	482	-6.62053	Mutant	28	female	G3	Methylated	codel
TCGA-QH-A65Z-01A	0	427	-6.35761	Mutant	54	male	G2	Methylated	codel
TCGA-QH-A6CS-01A	0	588	-3.83158	WT	41	male	G3	Unmethylated	non-codel
TCGA-QH-A6CU-01A	0	451	-5.62266	Mutant	52	female	G3	Methylated	codel
TCGA-QH-A6CV-01A	0	442	-3.80525	WT	51	male	G3	Unmethylated	non-codel
TCGA-QH-A6CW-01A	0	414	-5.7528	Mutant	43	male	G3	Methylated	non-codel
TCGA-QH-A6CX-01A	1	372	-4.04474	WT	66	male	G2	Unmethylated	non-codel
TCGA-QH-A6CY-01A	0	408	-6.13199	Mutant	38	male	G3	Methylated	codel
TCGA-QH-A6CZ-01A	0	279	-6.2377	Mutant	38	male	G2	Methylated	codel
TCGA-QH-A6X3-01A	0	313	-5.53807	Mutant	27	male	G2	Methylated	non-codel
TCGA-QH-A6X4-01A	0	442	-5.94914	Mutant	47	male	G3	Methylated	codel
TCGA-QH-A6X5-01A	0	497	-5.93276	Mutant	58	female	G2	Methylated	codel
TCGA-QH-A6X8-01A	0	509	-6.15577	Mutant	56	female	G3	Methylated	codel
TCGA-QH-A6X9-01A	0	58	-6.00129	Mutant	73	female	G2	Methylated	non-codel
TCGA-QH-A6XA-01A	0	502	-5.70816	Mutant	23	female	G2	Methylated	non-codel
TCGA-QH-A6XC-01A	0	508	-4.21162	WT	48	male	G3	Methylated	non-codel
TCGA-QH-A86X-01A	0	337	-5.52276	Mutant	33	male	G2	Methylated	codel
TCGA-QH-A870-01A	0	395	-4.89351	Mutant	38	female	G3	Methylated	non-codel
TCGA-R8-A6MK-01A	0	2702	-5.80631	Mutant	40	male	G2	Methylated	codel
TCGA-R8-A6ML-01A	0	2860	-6.06279	Mutant	52	male	G3	Methylated	codel
TCGA-R8-A6MO-01A	0	993	-6.11751	Mutant	53	female	G2	Methylated	codel
TCGA-R8-A73M-01A	0	1806	-6.86932	Mutant	48	female	G2	Methylated	codel
TCGA-RY-A83X-01A	0	939	-6.56855	Mutant	NA	NA	NA	Methylated	codel
TCGA-RY-A83Y-01A	0	166	-5.9256	Mutant	NA	NA	NA	Methylated	codel
TCGA-RY-A83Z-01A	0	301	-6.43785	Mutant	NA	NA	NA	Methylated	non-codel
TCGA-RY-A840-01A	0	854	-7.30648	Mutant	NA	NA	NA	Methylated	codel
TCGA-RY-A843-01A	0	63	-5.96077	Mutant	NA	NA	NA	Methylated	non-codel
TCGA-RY-A845-01A	0	596	-5.5536	Mutant	NA	NA	NA	Methylated	non-codel
TCGA-RY-A847-01A	0	933	-5.90503	Mutant	NA	NA	NA	Methylated	codel
TCGA-S9-A6TS-01A	1	1891	-5.88513	Mutant	48	female	G3	Methylated	non-codel
TCGA-S9-A6TU-01A	0	2650	-5.6972	Mutant	38	male	G2	Methylated	non-codel
TCGA-S9-A6TV-01A	0	571	-4.74871	Mutant	50	male	G3	Methylated	non-codel
TCGA-S9-A6TW-01A	0	1250	-6.0238	Mutant	40	male	G3	Methylated	codel
TCGA-S9-A6TX-01A	0	1245	-6.11574	Mutant	46	male	G3	Methylated	codel
TCGA-S9-A6TY-01A	0	1076	-5.59268	Mutant	50	male	G2	Methylated	codel
TCGA-S9-A6TZ-01A	0	1120	-6.2671	Mutant	39	female	G2	Methylated	non-codel
TCGA-S9-A6U0-01A	1	742	-3.82353	WT	46	male	G3	Methylated	non-codel
TCGA-S9-A6U1-01A	0	785	-6.27601	Mutant	22	female	G3	Methylated	non-codel
TCGA-S9-A6U2-01A	0	908	-5.62821	Mutant	48	female	G2	Methylated	codel
TCGA-S9-A6U5-01A	0	992	-5.67302	Mutant	33	male	G2	Methylated	codel
TCGA-S9-A6U6-01A	0	1069	-6.17362	Mutant	28	male	G3	Methylated	non-codel
TCGA-S9-A6U8-01A	1	2988	-5.67221	Mutant	24	male	G2	Methylated	non-codel
TCGA-S9-A6U9-01A	0	2918	-5.76583	Mutant	36	male	G3	Methylated	non-codel
TCGA-S9-A6UA-01A	1	178	-4.05221	WT	66	male	G3	Methylated	non-codel
TCGA-S9-A6UB-01A	0	3761	-6.07258	Mutant	52	male	G2	Methylated	codel
TCGA-S9-A6WD-01A	0	2289	-6.21433	Mutant	58	male	G3	Methylated	codel
TCGA-S9-A6WE-01A	0	4113	-6.44501	Mutant	34	male	G2	Methylated	codel
TCGA-S9-A6WG-01A	0	2602	-5.21787	Mutant	31	male	G3	Methylated	non-codel
TCGA-S9-A6WH-01A	0	1173	-5.89614	Mutant	73	female	G2	Methylated	codel
TCGA-S9-A6WI-01A	0	2585	-5.77012	Mutant	56	female	G2	Methylated	non-codel
TCGA-S9-A6WL-01A	0	946	-5.57822	Mutant	52	male	G3	Methylated	codel
TCGA-S9-A6WM-01A	0	604	-4.51166	WT	59	female	G3	Unmethylated	non-codel
TCGA-S9-A6WN-01A	0	805	-5.00844	Mutant	38	female	G3	Methylated	codel
TCGA-S9-A6WO-01A	0	566	-5.57323	Mutant	29	male	G2	Methylated	non-codel
TCGA-S9-A6WP-01A	0	567	-5.73047	Mutant	42	male	G3	Methylated	codel
TCGA-S9-A6WQ-01A	0	428	-5.76275	Mutant	57	female	G2	Methylated	non-codel
TCGA-S9-A7IQ-01A	0	1099	-5.70754	Mutant	45	female	G2	Methylated	codel
TCGA-S9-A7IS-01A	1	241	-5.95119	Mutant	33	female	G3	Methylated	non-codel
TCGA-S9-A7IX-01A	1	819	-4.24668	WT	57	male	G3	Unmethylated	non-codel
TCGA-S9-A7IY-01A	0	715	-5.84304	Mutant	39	male	G3	Methylated	codel
TCGA-S9-A7IZ-01A	0	608	-4.80021	Mutant	48	female	G3	Methylated	non-codel
TCGA-S9-A7J0-01A	0	609	-6.1927	Mutant	30	female	G3	Methylated	non-codel
TCGA-S9-A7J1-01A	0	249	-5.43886	Mutant	43	male	G2	Methylated	codel
TCGA-S9-A7J2-01A	0	62	-5.9192	Mutant	25	male	G3	Methylated	codel
TCGA-S9-A7J3-01A	0	629	-5.6084	Mutant	52	female	G3	Methylated	codel
TCGA-S9-A7QW-01A	0	458	-5.69883	Mutant	54	female	G3	Methylated	non-codel
TCGA-S9-A7QX-01A	0	564	-5.87966	Mutant	36	female	G3	Methylated	non-codel
TCGA-S9-A7QY-01A	0	863	-5.59418	Mutant	35	female	G2	Methylated	codel
TCGA-S9-A7QZ-01A	0	826	-5.56967	Mutant	41	male	G2	Methylated	codel
TCGA-S9-A7R1-01A	1	5166	-6.48149	Mutant	35	male	G2	Methylated	codel
TCGA-S9-A7R2-01A	1	316	-3.89068	WT	69	male	G3	Unmethylated	non-codel
TCGA-S9-A7R3-01A	0	3013	-5.92885	Mutant	28	female	G2	Methylated	non-codel
TCGA-S9-A7R4-01A	0	914	-5.65283	Mutant	46	male	G3	Methylated	non-codel
TCGA-S9-A7R7-01A	0	3000	-4.7993	Mutant	27	male	G2	Methylated	non-codel
TCGA-S9-A7R8-01A	1	961	-5.35736	Mutant	44	female	G3	Methylated	non-codel
TCGA-S9-A89V-01A	0	569	-5.457	WT	70	male	G3	Methylated	non-codel
TCGA-S9-A89Z-01A	0	623	-5.69615	Mutant	40	male	G3	Methylated	non-codel
TCGA-TM-A7C3-01A	1	1666	-3.83743	WT	43	female	G3	Methylated	non-codel
TCGA-TM-A7C4-01A	0	1470	-5.57998	Mutant	39	female	G2	Methylated	non-codel
TCGA-TM-A7C5-01A	0	1500	-6.09112	Mutant	30	male	G2	Methylated	codel
TCGA-TM-A7CA-01A	0	1058	-5.72882	Mutant	44	male	G2	Methylated	non-codel
TCGA-TM-A7CF-02A	0	1989	-5.66401	Mutant	41	female	G2	Methylated	non-codel
TCGA-TM-A7CF-01A	0	1989	-5.54216	Mutant	41	female	G2	Methylated	non-codel
TCGA-TM-A84B-01A	1	758	-4.47973	WT	40	male	G3	Unmethylated	non-codel
TCGA-TM-A84C-01A	1	492	-5.05888	WT	32	male	G2	Unmethylated	non-codel
TCGA-TM-A84F-01A	0	1796	-5.63379	Mutant	48	male	G3	Methylated	non-codel
TCGA-TM-A84G-01A	0	1236	-6.07992	Mutant	54	female	G3	Methylated	codel
TCGA-TM-A84H-01A	0	926	-5.77109	Mutant	44	female	G3	Methylated	non-codel
TCGA-TM-A84I-01A	0	854	-5.22775	Mutant	30	male	G3	Methylated	non-codel
TCGA-TM-A84J-01A	0	735	-6.24165	WT	63	male	G3	Unmethylated	non-codel
TCGA-TM-A84L-01A	1	1242	-5.68707	Mutant	31	male	G2	Methylated	non-codel
TCGA-TM-A84M-01A	0	754	-5.93744	Mutant	40	male	G3	Methylated	codel
TCGA-TM-A84O-01A	1	1011	-5.1273	Mutant	61	female	G3	Methylated	codel
TCGA-TM-A84Q-01A	0	772	-5.45186	Mutant	31	male	G2	Methylated	non-codel
TCGA-TM-A84R-01A	0	566	-5.86484	Mutant	46	male	G2	Methylated	codel
TCGA-TM-A84S-01A	0	454	-6.04502	Mutant	36	male	G3	Methylated	codel
TCGA-TM-A84T-01A	0	724	-5.82738	Mutant	19	male	G2	Methylated	non-codel
TCGA-TQ-A7RF-01A	0	650	-6.06626	Mutant	NA	NA	NA	Unmethylated	non-codel
TCGA-TQ-A7RG-01A	0	599	-5.8681	Mutant	NA	NA	NA	Methylated	codel
TCGA-TQ-A7RH-01A	0	486	-4.74169	Mutant	NA	NA	NA	Methylated	non-codel
TCGA-TQ-A7RI-01A	0	62	-5.20822	Mutant	NA	NA	NA	Methylated	codel
TCGA-TQ-A7RJ-01A	0	1229	-5.92998	Mutant	NA	NA	NA	Methylated	non-codel
TCGA-TQ-A7RK-01A	0	1341	-6.20275	Mutant	NA	NA	NA	Methylated	non-codel
TCGA-TQ-A7RK-02B	0	1341	-5.56115	Mutant	NA	NA	NA	Methylated	non-codel
TCGA-TQ-A7RK-02A	0	1341	-5.68539	Mutant	NA	NA	NA	Methylated	non-codel
TCGA-TQ-A7RM-01A	0	1116	-4.48997	Mutant	NA	NA	NA	Methylated	non-codel
TCGA-TQ-A7RN-01A	0	1026	-6.16854	Mutant	NA	NA	NA	Methylated	codel
TCGA-TQ-A7RO-01A	0	949	-5.82054	Mutant	NA	NA	NA	Methylated	codel
TCGA-TQ-A7RP-01A	0	914	-4.16741	WT	NA	NA	NA	Methylated	non-codel
TCGA-TQ-A7RQ-01A	0	795	-5.84207	Mutant	NA	NA	NA	Methylated	codel
TCGA-TQ-A7RR-01A	0	787	-5.74334	Mutant	NA	NA	NA	Unmethylated	non-codel
TCGA-TQ-A7RV-01A	0	1868	-5.81458	Mutant	NA	NA	NA	Methylated	non-codel
TCGA-TQ-A7RV-02A	0	1868	-5.45764	Mutant	NA	NA	NA	Methylated	non-codel
TCGA-TQ-A7RW-01A	1	821	-5.09517	Mutant	NA	NA	NA	Methylated	non-codel
TCGA-TQ-A8XE-02A	1	954	-5.06993	Mutant	NA	NA	NA	Methylated	non-codel
TCGA-TQ-A8XE-01A	1	954	-5.82896	Mutant	NA	NA	NA	Methylated	non-codel
TCGA-VM-A8C8-01A	0	1397	-5.90674	Mutant	50	female	G2	Unmethylated	non-codel
TCGA-VM-A8C9-01A	0	1314	-5.66352	WT	37	female	G2	Unmethylated	non-codel
TCGA-VM-A8CA-01A	0	411	-5.5871	Mutant	54	male	G2	Methylated	non-codel
TCGA-VM-A8CB-01A	0	3	-6.97201	Mutant	33	male	G3	Methylated	codel
TCGA-VM-A8CD-01A	1	240	-4.52386	WT	58	male	G3	Unmethylated	non-codel
TCGA-VM-A8CE-01A	0	1191	-5.61523	Mutant	25	male	G2	Methylated	codel
TCGA-VM-A8CF-01A	0	609	-5.32833	Mutant	NA	NA	NA	Methylated	non-codel
TCGA-VM-A8CH-01A	0	714	-5.99157	Mutant	24	female	G2	Unmethylated	non-codel
TCGA-VV-A829-01A	0	1127	-6.11196	Mutant	44	male	G3	Methylated	codel
TCGA-VV-A86M-01A	0	487	-5.58598	Mutant	36	female	G3	Methylated	non-codel
TCGA-VW-A7QS-01A	0	706	-6.35299	Mutant	35	female	G3	Methylated	codel
TCGA-VW-A8FI-01A	1	245	-3.9112	WT	66	male	G3	Unmethylated	non-codel
TCGA-W9-A837-01A	0	1553	-5.94415	Mutant	47	male	G2	Methylated	codel
TCGA-WH-A86K-01A	0	405	-5.70541	Mutant	65	male	G2	Methylated	non-codel
TCGA-WY-A858-01A	0	1337	-5.16512	Mutant	32	female	G3	Methylated	non-codel
TCGA-WY-A859-01A	0	1213	-6.24649	Mutant	NA	NA	NA	Methylated	non-codel
TCGA-WY-A85A-01A	0	1320	-5.85245	Mutant	NA	NA	NA	Methylated	non-codel
TCGA-WY-A85B-01A	0	1393	-5.48431	Mutant	NA	NA	NA	Methylated	non-codel
TCGA-WY-A85C-01A	0	1426	-6.03435	Mutant	NA	NA	NA	Methylated	non-codel
TCGA-WY-A85D-01A	0	1147	-5.80386	Mutant	NA	NA	NA	Unmethylated	non-codel
TCGA-WY-A85E-01A	0	633	-5.54708	Mutant	NA	NA	NA	Methylated	non-codel

## Sheet: Table S2
sample	event	time	Risk score	IDH	age	gender	grade	1p19q
CGGA_1002	1	305	-6.40521	WT	43	Female	G3	non-codel
CGGA_1003	0	3817	-7.67317	Mutant	47	Female	G2	codel
CGGA_1010	1	246	-4.33912	Mutant	45	Male	G2	NA
CGGA_1012	1	3679	-6.48754	Mutant	45	Male	G2	non-codel
CGGA_1014	1	263	-5.67538	WT	42	Male	G2	non-codel
CGGA_1017	1	768	-6.10904	WT	29	Female	G4	non-codel
CGGA_1018	1	2527	-5.92035	Mutant	50	Male	G2	codel
CGGA_103	1	1188	-6.59022	Mutant	56	Male	G3	non-codel
CGGA_1030	0	3664	-7.02806	Mutant	40	Female	G2	non-codel
CGGA_1032	1	643	-3.78498	WT	41	Female	G2	NA
CGGA_1033	0	1322	-7.1685	NA	44	Male	G2	non-codel
CGGA_1036	1	806	-5.8877	WT	41	Male	G4	non-codel
CGGA_1037	0	780	-7.40808	NA	44	Male	G2	codel
CGGA_1041	0	3593	-6.66025	WT	58	Male	G4	non-codel
CGGA_1048	0	703	-7.4151	WT	27	Female	G2	non-codel
CGGA_1051	1	838	-6.46211	WT	47	Male	G2	codel
CGGA_1055	1	1611	-5.31465	Mutant	43	Male	G3	non-codel
CGGA_1057	1	1549	-5.39012	WT	57	Female	G2	non-codel
CGGA_1058	1	995	-6.3558	Mutant	34	Male	G2	non-codel
CGGA_106	0	5028	-6.05811	WT	30	Male	G2	non-codel
CGGA_1065	0	3412	-7.21059	Mutant	48	Female	G2	codel
CGGA_1066	1	723	-6.60949	Mutant	34	Female	G2	non-codel
CGGA_107	1	2156	-5.3978	WT	38	Female	G3	non-codel
CGGA_1075	1	398	-4.23586	WT	72	Male	G4	non-codel
CGGA_108	1	366	-5.19843	WT	44	Male	G3	non-codel
CGGA_1086	1	1977	-3.47489	WT	65	Female	G4	NA
CGGA_1087	0	701	-7.03321	Mutant	36	Female	G2	codel
CGGA_1097	1	1378	-5.41711	WT	30	Male	G2	non-codel
CGGA_1100	0	3314	-4.7829	Mutant	61	Female	G2	NA
CGGA_1101	1	214	-3.21187	WT	35	Female	G2	NA
CGGA_1103	1	585	-5.41657	Mutant	35	Female	G4	non-codel
CGGA_1106	1	420	-3.90069	WT	37	Male	G4	non-codel
CGGA_1108	1	684	-4.43632	WT	39	Female	G3	non-codel
CGGA_1111	1	2696	-6.63127	Mutant	45	Male	G3	non-codel
CGGA_112	1	1534	-5.36403	Mutant	17	Male	G2	non-codel
CGGA_1120	1	422	-5.08613	Mutant	58	Female	G3	NA
CGGA_1121	0	3278	-7.15927	Mutant	29	Female	G3	non-codel
CGGA_1126	1	784	-5.77509	Mutant	44	Male	G3	non-codel
CGGA_1127	1	2630	-6.92767	NA	33	Male	G2	codel
CGGA_1130	1	402	-6.82934	Mutant	23	Female	G4	non-codel
CGGA_1131	0	3251	-6.10744	Mutant	46	Female	G3	non-codel
CGGA_1132	0	3251	-7.49631	Mutant	33	Female	G3	codel
CGGA_1134	1	59	-4.71524	WT	56	Female	G4	non-codel
CGGA_1135	1	1244	-6.02782	WT	40	Male	G4	non-codel
CGGA_1137	0	3237	-3.84813	WT	58	Male	G3	NA
CGGA_1138	1	411	-5.75507	WT	54	Male	G4	non-codel
CGGA_1141	1	432	-6.40891	WT	65	Male	G3	non-codel
CGGA_1142	1	1005	-5.29844	WT	60	Male	G4	non-codel
CGGA_1144	0	2505	-5.82301	WT	39	Female	G3	non-codel
CGGA_1147	0	3215	-6.34353	Mutant	36	Male	G2	non-codel
CGGA_1148	1	596	-6.61707	Mutant	37	Male	G2	non-codel
CGGA_1152	0	3201	-5.85549	WT	13	Male	G2	non-codel
CGGA_1154	1	369	-5.94698	Mutant	33	Female	G3	non-codel
CGGA_1155	1	1373	-7.96564	Mutant	43	Male	G3	codel
CGGA_1156	0	3194	-7.07236	Mutant	41	Female	G2	non-codel
CGGA_1157	1	727	-5.67666	WT	64	Male	G2	non-codel
CGGA_1158	0	3188	-6.82905	Mutant	39	Male	G2	codel
CGGA_1159	0	3181	-6.66285	Mutant	51	Male	G2	non-codel
CGGA_1161	0	3180	-7.23704	Mutant	36	Male	G3	non-codel
CGGA_1162	0	3174	-6.92922	NA	39	Male	G3	codel
CGGA_1164	1	1022	-7.82031	Mutant	38	Female	G4	codel
CGGA_1169	1	1765	-6.74969	Mutant	30	Male	G3	non-codel
CGGA_1172	0	3131	-7.31004	Mutant	36	Female	G4	non-codel
CGGA_1178	1	422	-6.31669	Mutant	41	Male	G3	non-codel
CGGA_1181	0	318	-7.26242	Mutant	36	Male	G2	non-codel
CGGA_1183	1	408	-5.01658	WT	25	Female	G3	non-codel
CGGA_1184	1	156	-7.02552	Mutant	46	Male	G3	non-codel
CGGA_1185	1	731	-7.10414	WT	50	Female	G3	non-codel
CGGA_1191	0	3082	-5.67809	Mutant	53	Male	G3	codel
CGGA_1192	0	3080	-6.36719	Mutant	43	Female	G2	non-codel
CGGA_1195	1	476	-6.91711	Mutant	43	Male	G3	non-codel
CGGA_1198	0	3066	-3.66188	Mutant	30	Male	G2	NA
CGGA_120	1	288	-4.19732	WT	42	Male	G4	non-codel
CGGA_1204	0	3056	-6.90786	Mutant	53	Male	G2	codel
CGGA_1205	1	929	-2.01314	WT	59	Female	G3	NA
CGGA_1207	0	3049	-7.61985	NA	49	Female	G3	codel
CGGA_1208	1	161	-3.79433	WT	38	Male	G4	non-codel
CGGA_1211	0	3042	-5.69148	Mutant	40	Male	G2	codel
CGGA_1212	1	2292	-5.96586	Mutant	31	Male	G3	non-codel
CGGA_1223	1	682	-4.90127	WT	42	Male	G3	non-codel
CGGA_1226	1	670	-5.83674	WT	33	Female	G2	non-codel
CGGA_1228	0	2626	-6.55223	WT	34	Male	G2	non-codel
CGGA_1232	1	2067	-5.96401	Mutant	39	Male	G3	non-codel
CGGA_1235	0	3004	-6.72147	Mutant	32	Female	G3	non-codel
CGGA_1236	1	191	-6.36796	WT	47	Female	G4	non-codel
CGGA_1238	0	2996	-5.53772	WT	11	Female	G2	non-codel
CGGA_1239	0	2997	-6.74767	Mutant	44	Female	G2	codel
CGGA_1248	1	138	-5.61149	WT	54	Male	G4	non-codel
CGGA_1255	1	118	-3.67415	WT	49	Male	G4	non-codel
CGGA_1256	0	2557	-6.21269	NA	52	Female	G4	non-codel
CGGA_1257	1	192	-6.28205	WT	59	Male	G4	non-codel
CGGA_1260	1	177	-6.90743	WT	32	Male	G4	non-codel
CGGA_1262	1	166	-2.75208	WT	69	Female	G4	NA
CGGA_1264	0	2929	-6.8656	Mutant	37	Female	G3	codel
CGGA_1269	0	2923	-6.63575	Mutant	35	Female	G3	codel
CGGA_1273	0	2438	-5.89013	Mutant	64	Male	G3	non-codel
CGGA_1282	1	1116	-5.26652	WT	33	Female	G4	non-codel
CGGA_1286	0	2906	-7.66358	Mutant	52	Female	G2	codel
CGGA_1291	0	2422	-7.09581	NA	41	Male	G3	codel
CGGA_1295	1	310	-6.65187	Mutant	40	Male	G3	non-codel
CGGA_1300	1	1793	-6.67105	Mutant	35	Male	G3	non-codel
CGGA_1303	0	2861	-4.84915	Mutant	45	Female	G3	NA
CGGA_1305	1	2702	-7.05801	Mutant	43	Male	G3	non-codel
CGGA_1309	0	964	-7.13608	NA	65	Male	G3	codel
CGGA_1311	1	1080	-6.07608	Mutant	29	Female	G3	codel
CGGA_1317	0	2864	-4.01192	Mutant	45	Male	G2	NA
CGGA_1318	0	1497	-6.67967	Mutant	39	Male	G2	non-codel
CGGA_1319	0	2861	-7.43909	WT	42	Female	G3	non-codel
CGGA_1321	1	702	-6.46258	Mutant	46	Male	G3	non-codel
CGGA_1326	1	322	-5.18205	Mutant	45	Male	G4	non-codel
CGGA_1334	1	146	-5.26493	WT	33	Female	G2	non-codel
CGGA_1335	0	2839	-7.4441	Mutant	43	Female	G2	codel
CGGA_1337	1	2172	-7.81653	NA	67	Male	G4	non-codel
CGGA_1339	0	2832	-7.01874	Mutant	41	Male	G2	codel
CGGA_1345	0	2825	-7.35374	Mutant	56	Male	G2	codel
CGGA_135	1	1924	-4.0946	WT	41	Female	G3	non-codel
CGGA_1350	0	2819	-4.42039	Mutant	36	Male	G2	NA
CGGA_1353	1	1022	-4.40014	WT	65	Male	G4	non-codel
CGGA_1354	1	530	-6.56111	WT	40	Female	G4	non-codel
CGGA_1356	1	948	-6.52947	Mutant	52	Male	G3	non-codel
CGGA_1359	1	343	-5.68685	WT	21	Male	G3	non-codel
CGGA_1361	0	2804	-6.58395	Mutant	40	Male	G2	non-codel
CGGA_1362	0	2804	-6.65232	WT	64	Female	G3	non-codel
CGGA_1365	1	253	-4.92268	WT	55	Male	G4	NA
CGGA_1368	0	2797	-4.70937	Mutant	49	Male	G2	NA
CGGA_1369	0	360	-7.30901	Mutant	37	Female	G3	non-codel
CGGA_1371	0	2791	-6.71839	WT	68	Male	G4	non-codel
CGGA_1377	0	2780	-5.81387	Mutant	28	Male	G3	non-codel
CGGA_1378	1	378	-4.09468	WT	47	Male	G4	NA
CGGA_1380	1	291	-5.42677	WT	46	Male	G4	non-codel
CGGA_1382	1	284	-4.91913	WT	57	Male	G4	non-codel
CGGA_1383	0	884	-7.64824	Mutant	47	Female	G3	codel
CGGA_1386	0	2770	-6.76606	NA	34	Male	G3	codel
CGGA_1387	1	90	-4.89514	WT	41	Male	G4	non-codel
CGGA_1389	1	1669	-7.35396	Mutant	67	Female	G3	codel
CGGA_139	1	694	-5.99912	Mutant	59	Male	G4	non-codel
CGGA_1390	0	2050	-6.3235	Mutant	50	Male	G3	non-codel
CGGA_1391	0	426	-5.39062	WT	62	Male	G4	non-codel
CGGA_1392	1	473	-6.09118	WT	62	Male	G4	non-codel
CGGA_1398	1	554	-5.75187	Mutant	43	Male	G3	non-codel
CGGA_1400	0	2742	-7.41992	NA	53	Female	G3	codel
CGGA_1401	1	1680	-6.5414	Mutant	39	Male	G3	non-codel
CGGA_1402	0	2742	-5.07468	WT	30	Male	G4	non-codel
CGGA_1403	1	679	-4.53677	WT	43	Female	G4	non-codel
CGGA_1404	0	2741	-6.57771	Mutant	56	Female	G3	codel
CGGA_1407	0	2728	-7.74922	Mutant	29	Female	G3	codel
CGGA_1410	1	825	-5.51395	WT	27	Female	G4	non-codel
CGGA_1413	0	2720	-5.95267	Mutant	35	Male	G3	codel
CGGA_1415	0	2719	-4.82947	WT	30	Female	G4	non-codel
CGGA_1416	1	1933	-7.46442	Mutant	42	Male	G3	codel
CGGA_1417	0	2713	-6.42591	Mutant	56	Male	G3	codel
CGGA_1418	1	287	-3.42591	WT	73	Female	G4	NA
CGGA_1419	1	249	-4.60091	WT	56	Male	G4	non-codel
CGGA_1420	1	364	-5.48167	WT	60	Male	G4	non-codel
CGGA_1421	0	2699	-7.30023	NA	35	Male	G3	non-codel
CGGA_1422	1	204	-3.28044	WT	76	Male	G4	NA
CGGA_1424	0	2692	-4.88458	Mutant	41	Female	G3	NA
CGGA_1425	1	640	-7.39273	WT	22	Female	G4	codel
CGGA_1426	1	133	-6.30798	WT	50	Female	G4	non-codel
CGGA_1427	0	339	-7.1388	NA	30	Female	G2	non-codel
CGGA_1429	0	2685	-6.97943	Mutant	40	Female	G4	codel
CGGA_1430	1	162	-5.73484	WT	28	Female	G4	non-codel
CGGA_1431	1	2048	-5.90218	Mutant	48	Male	G3	non-codel
CGGA_1433	1	394	-4.90514	WT	72	Female	G4	non-codel
CGGA_1434	1	67	-4.13678	WT	61	Male	G3	non-codel
CGGA_1435	1	1657	-6.62782	Mutant	46	Female	G3	non-codel
CGGA_1437	1	1037	-6.86885	WT	48	Male	G3	non-codel
CGGA_1440	0	2670	-6.4603	Mutant	29	Female	G2	codel
CGGA_1441	1	1882	-5.02741	WT	70	Male	G4	non-codel
CGGA_1443	0	2665	-6.10199	WT	41	Male	G2	non-codel
CGGA_1444	1	378	-5.76586	WT	68	Female	G4	non-codel
CGGA_1445	0	2664	-3.90425	WT	37	Male	G3	NA
CGGA_1446	0	2664	-4.27549	Mutant	29	Male	G2	NA
CGGA_1447	1	308	-4.87698	WT	48	Male	G3	NA
CGGA_1451	1	438	-4.72715	WT	45	Female	G4	non-codel
CGGA_1452	1	468	-6.08578	WT	53	Male	G4	non-codel
CGGA_1454	0	2655	-7.00149	WT	42	Female	G2	non-codel
CGGA_1455	0	2655	-4.91652	Mutant	40	Male	G2	NA
CGGA_1457	1	312	-4.22035	WT	60	Male	G4	non-codel
CGGA_1458	1	127	-6.06671	Mutant	54	Female	G3	codel
CGGA_1459	1	503	-3.50183	WT	55	Male	G3	non-codel
CGGA_1461	1	226	-5.33112	WT	60	Female	G4	non-codel
CGGA_1462	1	174	-4.33242	WT	49	Male	G4	non-codel
CGGA_1463	0	2633	-6.94814	Mutant	69	Female	G2	codel
CGGA_1467	1	866	-5.76928	Mutant	58	Male	G4	NA
CGGA_1469	0	2626	-5.49713	Mutant	46	Male	G3	NA
CGGA_1471	0	2623	-6.61098	Mutant	45	Male	G2	non-codel
CGGA_1472	1	1025	-5.44889	NA	34	Male	G4	non-codel
CGGA_1473	1	265	-3.0615	NA	28	Female	G3	non-codel
CGGA_1474	0	333	-4.69844	Mutant	50	Female	G3	NA
CGGA_1476	1	299	-6.07468	WT	53	Female	G4	non-codel
CGGA_1477	1	1194	-7.62702	NA	43	Male	G2	non-codel
CGGA_1478	1	542	-6.06517	WT	72	Female	G4	non-codel
CGGA_1480	1	405	-5.54221	WT	41	Male	G4	non-codel
CGGA_1481	1	131	-2.2441	WT	55	Male	G4	NA
CGGA_1482	0	2592	-7.43011	NA	38	Male	G3	codel
CGGA_1486	1	184	-2.61585	WT	45	Male	G4	NA
CGGA_1487	1	520	-6.60584	WT	49	Female	G3	non-codel
CGGA_1488	0	2586	-6.5766	Mutant	31	Male	G2	non-codel
CGGA_1491	1	246	-5.86084	Mutant	29	Male	G4	non-codel
CGGA_1492	1	268	-4.65894	WT	47	Female	G4	non-codel
CGGA_1494	1	269	-3.20903	WT	21	Male	G4	NA
CGGA_1496	1	330	-6.27042	Mutant	42	Female	G4	codel
CGGA_1497	1	1178	-5.99564	Mutant	24	Female	G3	non-codel
CGGA_1500	1	108	-5.92526	WT	45	Female	G4	non-codel
CGGA_1501	1	222	-5.66284	NA	58	Male	G4	non-codel
CGGA_1502	0	2565	-6.8878	Mutant	27	Female	G2	codel
CGGA_1503	1	777	-3.04458	WT	47	Male	G4	NA
CGGA_1504	0	2558	-7.25499	Mutant	44	Female	G3	non-codel
CGGA_1505	1	172	-4.62548	Mutant	30	Male	G4	non-codel
CGGA_1507	1	715	-5.08201	WT	41	Female	G4	non-codel
CGGA_1508	1	1049	-5.73225	Mutant	39	Male	G3	non-codel
CGGA_1510	1	271	-5.85444	Mutant	40	Male	G3	non-codel
CGGA_1513	1	2352	-6.98182	Mutant	36	Female	G3	codel
CGGA_1514	1	76	-2.99847	WT	57	Female	G2	NA
CGGA_1516	0	2530	-6.73416	Mutant	46	Male	G2	codel
CGGA_1517	0	2530	-7.44991	Mutant	42	Male	G2	codel
CGGA_1518	1	411	-6.39627	WT	19	Female	G3	non-codel
CGGA_1520	1	297	-6.00389	WT	67	Female	G4	non-codel
CGGA_1521	1	205	-4.56552	WT	63	Female	G4	non-codel
CGGA_1523	0	2508	-5.01146	Mutant	50	Male	G2	non-codel
CGGA_1524	1	1004	-7.58116	Mutant	36	Male	G3	codel
CGGA_1525	1	1686	-6.25064	NA	41	Male	G3	non-codel
CGGA_1526	0	2502	-6.84256	Mutant	39	Male	G3	codel
CGGA_1527	1	1714	-7.08699	Mutant	47	Male	G3	non-codel
CGGA_1528	0	2497	-7.13627	Mutant	27	Female	G2	codel
CGGA_1529	1	583	-6.80925	WT	63	Male	G4	non-codel
CGGA_1530	0	2497	-5.91875	NA	41	Male	G3	non-codel
CGGA_1533	1	1217	-4.87032	WT	61	Female	G3	non-codel
CGGA_1534	1	27	-5.90946	Mutant	58	Female	G4	non-codel
CGGA_1535	1	232	-5.41602	Mutant	43	Male	G4	non-codel
CGGA_1536	1	840	-5.54162	Mutant	53	Male	G2	non-codel
CGGA_1537	1	97	-5.1326	WT	73	Male	G4	non-codel
CGGA_1538	1	247	-5.74744	WT	57	Female	G4	non-codel
CGGA_1539	0	2462	-5.8991	Mutant	61	Male	G4	non-codel
CGGA_1541	1	67	-6.07451	WT	50	Female	G4	non-codel
CGGA_1542	0	184	-3.42658	Mutant	26	Male	G4	NA
CGGA_1543	1	723	-5.40574	Mutant	57	Male	G4	non-codel
CGGA_1544	1	208	-6.35763	Mutant	38	Female	G3	non-codel
CGGA_1546	1	223	-4.44311	WT	56	Male	G4	non-codel
CGGA_1548	1	1054	-5.20508	WT	53	Male	G4	non-codel
CGGA_1551	1	347	-4.74287	NA	50	Female	G4	non-codel
CGGA_1552	0	2432	-7.20367	Mutant	39	Male	G3	codel
CGGA_1553	1	540	-6.49559	Mutant	30	Male	G3	non-codel
CGGA_1554	1	824	-6.51111	Mutant	34	Male	G3	codel
CGGA_1557	0	2427	-7.22353	Mutant	47	Male	G3	codel
CGGA_1558	1	130	-5.74677	WT	71	Male	G4	non-codel
CGGA_1559	1	603	-6.86359	Mutant	63	Male	G4	codel
CGGA_1560	1	459	-7.54609	Mutant	35	Female	G4	non-codel
CGGA_1562	1	2032	-7.00121	Mutant	51	Male	G3	codel
CGGA_1563	0	2423	-6.37228	WT	32	Female	G2	non-codel
CGGA_1564	1	190	-5.44583	WT	48	Male	G4	non-codel
CGGA_1565	0	1417	-6.51644	Mutant	23	Female	G3	non-codel
CGGA_1566	0	2420	-7.95056	Mutant	43	Female	G3	codel
CGGA_1567	1	840	-6.15538	Mutant	48	Female	G3	non-codel
CGGA_1568	0	345	-7.56227	NA	26	Female	G3	non-codel
CGGA_1569	0	1406	-7.11233	WT	27	Female	G3	codel
CGGA_157	1	914	-6.67279	NA	34	Male	G2	non-codel
CGGA_1571	0	412	-7.27465	Mutant	43	Female	G4	non-codel
CGGA_1572	1	160	-6.77386	WT	60	Female	G4	non-codel
CGGA_1575	1	129	-5.96268	Mutant	37	Male	G3	non-codel
CGGA_1579	0	2398	-7.35759	WT	37	Male	G2	non-codel
CGGA_1580	1	1581	-6.07945	Mutant	34	Female	G3	non-codel
CGGA_1583	1	1606	-7.27054	NA	51	Female	G2	non-codel
CGGA_1586	1	232	-5.07155	WT	55	Female	G4	non-codel
CGGA_1587	1	750	-6.3302	Mutant	30	Female	G3	non-codel
CGGA_1588	0	2003	-6.29528	WT	24	Female	G3	non-codel
CGGA_1589	1	342	-6.19332	WT	49	Male	G2	non-codel
CGGA_1591	1	1133	-5.91199	Mutant	54	Male	G3	non-codel
CGGA_1592	1	1588	-6.38942	Mutant	37	Male	G3	codel
CGGA_1594	0	480	-6.3978	NA	25	Male	G2	non-codel
CGGA_1595	0	2363	-6.58577	NA	34	Female	G4	non-codel
CGGA_1596	1	205	-6.72484	WT	63	Male	G4	non-codel
CGGA_1597	1	174	-5.00795	WT	58	Male	G4	non-codel
CGGA_1598	1	564	-6.64089	WT	31	Male	G3	non-codel
CGGA_1601	1	710	-4.0153	WT	66	Male	G4	non-codel
CGGA_1603	1	356	-3.42107	WT	18	Male	G4	non-codel
CGGA_1604	1	740	-5.85623	Mutant	46	Male	G4	non-codel
CGGA_1605	1	321	-6.68765	WT	34	Male	G4	non-codel
CGGA_1606	1	471	-4.9426	WT	28	Female	G3	non-codel
CGGA_1607	1	1333	-6.32499	Mutant	35	Female	G2	codel
CGGA_1608	0	1953	-6.01329	Mutant	38	Male	G3	non-codel
CGGA_1610	1	1058	-6.55624	NA	39	Male	G3	codel
CGGA_1611	1	1158	-7.68195	Mutant	30	Female	G4	non-codel
CGGA_1612	1	718	-4.4406	WT	68	Male	G4	non-codel
CGGA_1613	0	250	-4.34695	WT	53	Male	G4	non-codel
CGGA_1614	1	1079	-6.13002	Mutant	51	Male	G3	non-codel
CGGA_1615	1	586	-5.74289	WT	48	Male	G4	codel
CGGA_1617	0	2310	-7.11138	NA	35	Female	G2	codel
CGGA_1618	0	2319	-7.52702	Mutant	31	Male	G3	non-codel
CGGA_1619	1	766	-6.74094	Mutant	44	Male	G3	non-codel
CGGA_1620	0	2312	-6.85651	Mutant	51	Male	G3	codel
CGGA_1621	0	2311	-6.4717	Mutant	48	Female	G2	non-codel
CGGA_1623	0	2307	-5.06721	WT	16	Female	G3	non-codel
CGGA_1624	1	87	-4.33982	Mutant	27	Female	G4	non-codel
CGGA_1626	1	696	-4.35865	WT	66	Male	G4	non-codel
CGGA_1627	0	2301	-5.89068	Mutant	37	Male	G3	non-codel
CGGA_1630	0	2160	-6.56095	NA	26	Male	G2	codel
CGGA_1631	1	221	-5.10645	WT	58	Female	G4	non-codel
CGGA_1634	1	366	-5.53422	WT	26	Female	G4	non-codel
CGGA_1635	1	332	-4.77668	WT	43	Female	G4	NA
CGGA_1640	0	2267	-6.12757	NA	55	Male	G3	non-codel
CGGA_1641	1	291	-6.76109	WT	57	Female	G4	non-codel
CGGA_1642	0	2266	-7.37493	Mutant	48	Male	G2	non-codel
CGGA_1644	1	173	-4.8898	WT	48	Male	G4	non-codel
CGGA_1645	0	1996	-5.82712	Mutant	59	Male	G3	non-codel
CGGA_1647	0	2229	-6.80886	NA	40	Male	G2	codel
CGGA_1648	0	1747	-7.66295	NA	45	Female	G3	codel
CGGA_1649	0	2225	-7.32641	Mutant	36	Male	G2	codel
CGGA_165	0	183	-7.09734	NA	34	Male	G2	non-codel
CGGA_1650	1	1283	-7.05581	Mutant	36	Male	G4	non-codel
CGGA_1651	1	842	-6.99872	Mutant	44	Female	G2	non-codel
CGGA_1653	0	2217	-6.20881	NA	47	Female	G2	non-codel
CGGA_1655	0	1209	-6.78013	Mutant	48	Male	G2	non-codel
CGGA_1656	1	149	-5.11182	WT	56	Male	G4	non-codel
CGGA_1657	0	2215	-7.34123	NA	20	Female	G3	non-codel
CGGA_1658	1	1574	-5.40284	WT	64	Female	G4	non-codel
CGGA_1659	1	387	-4.88201	WT	24	Male	G4	non-codel
CGGA_1661	0	2209	-6.41652	NA	42	Female	G3	non-codel
CGGA_1662	0	1493	-6.86049	Mutant	55	Female	G2	codel
CGGA_1663	1	290	-5.44013	WT	61	Male	G4	non-codel
CGGA_1664	1	1528	-6.79049	Mutant	40	Female	G2	non-codel
CGGA_1666	1	249	-2.83259	WT	60	Male	G4	NA
CGGA_1667	0	2180	-6.83302	Mutant	40	Female	G3	codel
CGGA_1669	1	139	-3.83661	WT	44	Female	G3	non-codel
CGGA_1670	1	365	-6.56633	WT	30	Female	G3	non-codel
CGGA_1671	0	2168	-7.33475	Mutant	26	Female	G3	non-codel
CGGA_1673	0	2160	-6.26825	Mutant	23	Female	G2	non-codel
CGGA_1675	0	2154	-5.91634	Mutant	38	Male	G3	non-codel
CGGA_1678	1	657	-2.37987	WT	51	Male	G4	NA
CGGA_1679	0	2146	-7.39417	Mutant	52	Female	G3	codel
CGGA_1680	1	596	-6.17012	Mutant	45	Male	G3	non-codel
CGGA_1681	1	346	-5.71766	WT	58	Female	G4	codel
CGGA_1682	1	345	-3.92597	WT	67	Male	G4	non-codel
CGGA_1685	1	225	-5.79997	Mutant	33	Male	G3	non-codel
CGGA_1686	1	745	-5.99486	WT	27	Male	G3	non-codel
CGGA_1687	0	2118	-3.3348	WT	14	Male	G4	non-codel
CGGA_1688	1	51	-5.91858	WT	51	Female	G3	non-codel
CGGA_1689	0	2118	-6.33002	Mutant	45	Male	G2	non-codel
CGGA_1690	1	592	-5.22409	WT	60	Male	G4	non-codel
CGGA_1693	1	517	-6.99627	NA	61	Male	G3	non-codel
CGGA_1694	1	624	-5.00987	WT	55	Male	G4	non-codel
CGGA_1695	0	2094	-7.18364	Mutant	45	Male	G3	non-codel
CGGA_1696	0	1205	-4.26666	WT	72	Male	G3	NA
CGGA_1697	1	89	-5.82796	WT	47	Female	G4	non-codel
CGGA_1698	1	388	-4.99412	WT	55	Female	G4	non-codel
CGGA_1699	0	2088	-5.01646	Mutant	41	Female	G4	NA
CGGA_1700	0	2076	-6.81271	Mutant	49	Male	G3	codel
CGGA_1701	0	1696	-7.44108	Mutant	44	Male	G3	codel
CGGA_1702	1	168	-5.82649	WT	29	Female	G4	non-codel
CGGA_1703	0	1592	-6.90329	Mutant	30	Female	G2	non-codel
CGGA_1704	0	2064	-6.34168	WT	32	Female	G2	non-codel
CGGA_1706	0	2068	-4.70499	WT	60	Male	G4	non-codel
CGGA_1708	1	1122	-6.10244	WT	54	Female	G4	non-codel
CGGA_1709	1	415	-5.41932	WT	47	Male	G4	non-codel
CGGA_1713	1	332	-7.0209	WT	62	Male	G4	non-codel
CGGA_1714	0	2034	-6.94108	NA	37	Female	G3	codel
CGGA_1715	0	2033	-5.91149	WT	12	Female	G2	non-codel
CGGA_1716	1	951	-5.62823	Mutant	38	Male	G3	non-codel
CGGA_1718	0	1996	-7.0274	Mutant	37	Female	G3	non-codel
CGGA_1720	0	1994	-5.97419	Mutant	35	Male	G2	non-codel
CGGA_1721	0	1994	-7.84245	NA	46	Female	G3	codel
CGGA_1722	1	349	-2.43788	WT	60	Female	G4	NA
CGGA_1723	0	1986	-7.01105	Mutant	39	Female	G3	codel
CGGA_1725	0	1983	-6.96768	Mutant	33	Female	G3	codel
CGGA_1727	0	1980	-7.472	Mutant	48	Male	G4	non-codel
CGGA_1728	1	917	-6.01416	Mutant	45	Male	G4	non-codel
CGGA_1729	1	244	-6.36439	WT	52	Male	G4	non-codel
CGGA_1731	0	1976	-8.09129	Mutant	45	Female	G3	non-codel
CGGA_1735	1	813	-5.74459	WT	54	Male	G4	non-codel
CGGA_1736	1	938	-4.18969	WT	57	Female	G4	non-codel
CGGA_1737	0	1952	-7.52764	Mutant	33	Male	G3	codel
CGGA_1738	1	469	-6.47887	WT	49	Male	G3	non-codel
CGGA_1739	1	515	-6.34099	Mutant	45	Male	G3	non-codel
CGGA_1740	1	363	-7.55536	WT	50	Female	G4	non-codel
CGGA_1743	1	1361	-6.54209	Mutant	47	Female	G3	non-codel
CGGA_1744	0	1936	-5.12561	NA	51	Male	G4	non-codel
CGGA_1745	0	1929	-5.03308	Mutant	45	Female	G3	NA
CGGA_1747	1	293	-5.75886	NA	27	Female	G3	non-codel
CGGA_1749	1	401	-4.74053	WT	44	Female	G4	non-codel
CGGA_1750	1	250	-6.37181	WT	52	Female	G4	non-codel
CGGA_1758	1	414	-5.09827	WT	45	Female	G4	non-codel
CGGA_1760	1	459	-5.2618	WT	51	Male	G2	non-codel
CGGA_1764	1	710	-6.43965	Mutant	33	Male	G4	non-codel
CGGA_1767	1	86	-2.25372	WT	63	Male	G4	NA
CGGA_1769	0	1854	-6.82708	WT	49	Female	G4	non-codel
CGGA_1770	1	267	-6.47949	Mutant	43	Female	G4	non-codel
CGGA_1771	1	1068	-7.04029	Mutant	38	Male	G3	non-codel
CGGA_1773	1	104	-5.27163	WT	46	Female	G4	non-codel
CGGA_1776	1	259	-5.53697	WT	23	Male	G4	non-codel
CGGA_1780	0	1826	-2.59717	WT	57	Female	G4	NA
CGGA_1785	1	329	-6.1345	Mutant	34	Male	G4	non-codel
CGGA_1786	0	1817	-7.90304	Mutant	54	Female	G3	codel
CGGA_1791	1	855	-5.00691	WT	55	Male	G3	NA
CGGA_1807	1	247	-6.71902	WT	65	Female	G4	non-codel
CGGA_1809	1	343	-5.94877	WT	27	Male	G3	non-codel
CGGA_1811	1	304	-6.29844	WT	64	Male	G4	non-codel
CGGA_1812	1	780	-6.1151	WT	65	Male	G4	non-codel
CGGA_1814	1	221	-5.04572	WT	46	Female	G4	non-codel
CGGA_1815	1	185	-4.24776	WT	45	Female	G4	non-codel
CGGA_1817	1	399	-5.31072	WT	72	Female	G4	non-codel
CGGA_1819	1	1005	-6.2896	WT	55	Male	G4	non-codel
CGGA_1820	1	77	-5.65561	WT	52	Female	G4	non-codel
CGGA_1826	1	44	-5.71706	WT	70	Female	G4	non-codel
CGGA_1829	0	801	-6.75044	WT	23	Male	G2	non-codel
CGGA_1833	1	494	-5.21785	WT	60	Female	G4	non-codel
CGGA_1840	0	1179	-6.83022	WT	58	Female	G4	non-codel
CGGA_1850	0	750	-6.71951	Mutant	29	Male	G2	non-codel
CGGA_1854	0	1626	-6.30555	Mutant	36	Male	G3	non-codel
CGGA_1857	1	157	-5.41514	WT	46	Male	G4	non-codel
CGGA_1862	1	110	-4.69716	WT	40	Male	G3	non-codel
CGGA_1863	0	1594	-7.93162	Mutant	50	Female	G3	codel
CGGA_1865	1	89	-4.35919	WT	45	Female	G4	non-codel
CGGA_1866	1	127	-4.94412	WT	68	Male	G4	non-codel
CGGA_1870	0	1556	-7.06022	Mutant	62	Male	G4	codel
CGGA_1875	0	1558	-5.48515	WT	22	Female	G2	non-codel
CGGA_1880	0	1302	-8.79995	Mutant	37	Female	G3	non-codel
CGGA_1882	0	1531	-7.19358	Mutant	33	Male	G3	codel
CGGA_1886	1	338	-5.02736	WT	31	Male	G4	non-codel
CGGA_1899	1	176	-7.08598	WT	45	Male	G4	non-codel
CGGA_1901	1	540	-4.71369	WT	60	Male	G4	non-codel
CGGA_1902	0	1479	-6.52277	Mutant	33	Male	G2	non-codel
CGGA_1903	0	1474	-6.89364	NA	24	Female	G3	codel
CGGA_1906	1	1054	-6.94145	Mutant	57	Male	G3	non-codel
CGGA_1908	1	298	-5.61377	WT	42	Female	G4	non-codel
CGGA_1911	0	1451	-4.3552	WT	15	Male	G4	non-codel
CGGA_1912	1	507	-5.63597	NA	48	Male	G4	non-codel
CGGA_194	1	2304	-6.58087	Mutant	43	Female	G3	codel
CGGA_1946	1	142	-4.70396	WT	51	Female	G4	non-codel
CGGA_1953	1	73	-6.13859	WT	47	Male	G4	non-codel
CGGA_1955	1	457	-8.38218	NA	30	Male	G4	non-codel
CGGA_1972	0	1291	-4.15957	WT	47	Male	G4	non-codel
CGGA_1976	1	73	-5.4189	WT	53	Female	G4	non-codel
CGGA_1985	1	380	-6.47222	Mutant	41	Male	G4	non-codel
CGGA_1994	0	1237	-7.46693	Mutant	32	Female	G3	non-codel
CGGA_2002	1	572	-6.52349	Mutant	40	Male	G2	non-codel
CGGA_2003	1	780	-6.0269	Mutant	40	Male	G4	non-codel
CGGA_2006	1	626	-6.3208	Mutant	43	Male	G3	non-codel
CGGA_2008	1	44	-5.37599	WT	56	Male	G4	non-codel
CGGA_2013	1	139	-7.41623	Mutant	41	Male	G2	codel
CGGA_2024	1	328	-6.5622	WT	19	Female	G4	non-codel
CGGA_2039	0	702	-7.38748	WT	28	Male	G4	non-codel
CGGA_2046	1	251	-6.07979	Mutant	46	Male	G3	non-codel
CGGA_2047	1	598	-5.73335	WT	64	Female	G4	non-codel
CGGA_2053	0	1031	-6.7808	WT	55	Male	G4	codel
CGGA_2056	0	1019	-5.58926	Mutant	41	Female	G4	non-codel
CGGA_2062	1	41	-5.55285	Mutant	63	Female	G4	non-codel
CGGA_2075	1	266	-3.91289	WT	63	Male	G4	non-codel
CGGA_2078	1	280	-5.31307	WT	61	Female	G4	non-codel
CGGA_2079	0	964	-7.32471	Mutant	45	Male	G3	codel
CGGA_2081	0	961	-7.84076	Mutant	39	Female	G3	codel
CGGA_2082	0	571	-4.96512	WT	41	Male	G4	non-codel
CGGA_2106	0	892	-8.01053	Mutant	39	Female	G4	codel
CGGA_2115	1	171	-5.91537	WT	31	Female	G4	non-codel
CGGA_2121	1	346	-5.40069	Mutant	41	Female	G2	non-codel
CGGA_2129	0	828	-6.67416	Mutant	48	Male	G3	non-codel
CGGA_265	0	3959	-6.60443	Mutant	43	Male	G2	non-codel
CGGA_279	1	1314	-6.58133	Mutant	49	Female	G3	non-codel
CGGA_28	1	1103	-6.82122	Mutant	25	Male	G2	codel
CGGA_288	1	1057	-6.68556	Mutant	49	Male	G2	codel
CGGA_290	0	4725	-5.40666	Mutant	37	Female	G2	codel
CGGA_320	1	3005	-6.55112	Mutant	31	Male	G2	codel
CGGA_336	1	2549	-6.36267	Mutant	57	Female	G3	codel
CGGA_358	1	122	-6.71473	Mutant	30	Female	G3	non-codel
CGGA_369	0	4606	-6.84622	Mutant	33	Male	G2	non-codel
CGGA_406	1	90	-7.0301	Mutant	24	Female	G3	non-codel
CGGA_42	1	2832	-6.36688	Mutant	38	Male	G2	codel
CGGA_420	0	3514	-6.59351	Mutant	39	Female	G3	codel
CGGA_457	1	75	-7.01394	Mutant	32	Male	G3	non-codel
CGGA_474	0	2029	-6.96364	WT	NA	Male	G3	non-codel
CGGA_482	1	2511	-5.96848	Mutant	45	Male	G2	codel
CGGA_487	1	156	-4.15722	WT	46	Male	G4	non-codel
CGGA_492	0	652	-5.41843	WT	27	Male	G3	non-codel
CGGA_503	0	4410	-6.41284	Mutant	51	Male	G2	non-codel
CGGA_507	1	302	-5.908	Mutant	53	Female	G3	non-codel
CGGA_509	1	623	-5.07574	WT	38	Male	G4	non-codel
CGGA_521	1	514	-4.77366	WT	32	Male	G3	non-codel
CGGA_530	1	506	-5.68263	WT	41	Female	G4	non-codel
CGGA_554	1	134	-6.85835	NA	46	Female	G3	non-codel
CGGA_568	1	285	-6.41266	WT	14	Male	G4	non-codel
CGGA_583	1	3107	-3.86707	Mutant	36	Female	G2	NA
CGGA_619	1	550	-6.09706	WT	40	Male	G2	non-codel
CGGA_625	1	2465	-7.65312	Mutant	33	Female	G3	codel
CGGA_634	1	2633	-6.44831	Mutant	35	Female	G3	non-codel
CGGA_652	1	476	-6.61461	Mutant	42	Male	G3	non-codel
CGGA_663	0	4210	-6.80005	Mutant	29	Female	G2	non-codel
CGGA_703	1	1355	-5.26121	Mutant	31	Female	G3	non-codel
CGGA_705	1	1507	-5.31443	Mutant	41	Male	G3	non-codel
CGGA_707	1	3299	-6.37035	Mutant	39	Female	G2	codel
CGGA_720	1	1258	-6.47582	Mutant	46	Female	G2	non-codel
CGGA_721	1	2552	-6.55903	Mutant	45	Male	G2	non-codel
CGGA_724	0	4147	-7.24386	Mutant	32	Male	G2	non-codel
CGGA_730	1	2118	-7.07148	Mutant	51	Female	G2	codel
CGGA_763	0	319	-6.56152	WT	52	Male	G3	non-codel
CGGA_777	1	146	-3.98679	WT	46	Male	G4	non-codel
CGGA_780	1	923	-5.53714	WT	64	Female	G3	non-codel
CGGA_799	1	1868	-7.19426	Mutant	53	Male	G3	codel
CGGA_809	1	1252	-6.8554	Mutant	26	Male	G2	non-codel
CGGA_810	1	551	-5.09975	WT	20	Male	G3	non-codel
CGGA_825	1	836	-6.35833	Mutant	36	Male	G3	non-codel
CGGA_831	1	546	-4.53702	WT	55	Female	G4	non-codel
CGGA_846	0	2991	-6.86491	WT	39	Female	G2	non-codel
CGGA_852	1	169	-5.11094	WT	40	Male	G3	non-codel
CGGA_861	1	893	-5.67091	WT	29	Male	G3	non-codel
CGGA_863	1	2073	-6.61564	WT	42	Female	G2	non-codel
CGGA_867	1	367	-6.16008	Mutant	40	Female	G3	non-codel
CGGA_869	0	537	-4.80213	WT	36	Female	G4	non-codel
CGGA_881	1	252	-4.9708	WT	23	Female	G3	non-codel
CGGA_882	0	1008	-6.68506	Mutant	30	Male	G3	non-codel
CGGA_888	1	669	-6.30254	Mutant	29	Male	G3	codel
CGGA_889	0	3943	-6.78846	Mutant	23	Male	G2	non-codel
CGGA_890	1	2982	-6.42138	Mutant	39	Male	G3	non-codel
CGGA_901	1	929	-6.44971	Mutant	40	Male	G3	non-codel
CGGA_903	1	1455	-5.46108	Mutant	27	Female	G3	non-codel
CGGA_D19	1	297	-5.90387	Mutant	64	Female	G2	codel
CGGA_D28	1	860	-6.98686	Mutant	25	Male	G3	non-codel
CGGA_D50	1	782	-6.53363	Mutant	30	Male	G2	codel
CGGA_J50	1	1693	-6.22293	Mutant	27	Male	G2	NA
CGGA_J73	1	1134	-6.33426	Mutant	34	Female	G3	NA
CGGA_P100	1	268	-6.24384	WT	67	Male	G4	non-codel
CGGA_P102	1	1269	-5.692	Mutant	30	Male	G4	non-codel
CGGA_P103	0	1651	-6.66017	Mutant	34	Male	G2	codel
CGGA_P104	1	167	-3.4852	Mutant	36	Female	G3	NA
CGGA_P106	1	71	-5.11974	WT	24	Male	G4	non-codel
CGGA_P108	0	1644	-4.41459	WT	30	Female	G3	non-codel
CGGA_P109	1	407	-5.9793	Mutant	35	Male	G4	non-codel
CGGA_P110	1	800	-6.32778	WT	56	Female	G3	non-codel
CGGA_P111	0	1638	-6.25131	Mutant	44	Female	G2	codel
CGGA_P112	1	834	-5.85875	WT	65	Male	G4	non-codel
CGGA_P113	0	1708	-5.54253	WT	32	Male	G2	non-codel
CGGA_P115	0	1626	-4.67871	WT	25	Male	G2	NA
CGGA_P116	1	305	-3.44616	WT	58	Male	G4	NA
CGGA_P121	0	1608	-7.32754	WT	39	Male	G2	non-codel
CGGA_P122	0	1638	-6.13159	Mutant	43	Male	G2	codel
CGGA_P128	0	1586	-6.52865	Mutant	41	Male	G2	non-codel
CGGA_P13	0	1938	-5.66113	Mutant	40	Female	G2	codel
CGGA_P131	0	1596	-6.22133	Mutant	45	Female	G3	codel
CGGA_P132	0	1603	-6.59435	Mutant	42	Male	G2	codel
CGGA_P136	1	842	-4.13297	WT	41	Female	G4	NA
CGGA_P137	0	1526	-6.31023	Mutant	42	Male	G2	non-codel
CGGA_P142	0	1558	-5.77291	Mutant	45	Male	G3	codel
CGGA_P143	1	261	-4.28357	WT	66	Female	G4	non-codel
CGGA_P144	0	1559	-5.50375	Mutant	44	Male	G3	non-codel
CGGA_P145	1	308	-6.65051	Mutant	53	Male	G2	non-codel
CGGA_P147	1	863	-5.3789	Mutant	52	Male	G2	non-codel
CGGA_P15	1	723	-6.46561	NA	49	Male	G4	non-codel
CGGA_P151	0	1582	-7.72927	Mutant	46	Female	G2	non-codel
CGGA_P153	0	1484	-4.36151	Mutant	45	Male	G2	NA
CGGA_P155	0	1483	-5.42363	WT	50	Male	G2	non-codel
CGGA_P156	0	1488	-6.04702	Mutant	30	Male	G2	codel
CGGA_P157	1	470	-5.40258	WT	55	Female	G3	non-codel
CGGA_P158	0	1510	-4.2105	Mutant	27	Male	G2	NA
CGGA_P159	1	211	-5.38962	WT	59	Male	G3	non-codel
CGGA_P160	1	219	-4.00845	WT	72	Female	G4	non-codel
CGGA_P163	1	855	-5.89092	Mutant	45	Female	G3	non-codel
CGGA_P164	0	1553	-2.26778	WT	27	Male	G4	NA
CGGA_P165	1	598	-4.71977	Mutant	51	Female	G3	NA
CGGA_P17	0	1930	-5.96075	Mutant	30	Male	G3	codel
CGGA_P172	1	1049	-4.70122	Mutant	33	Male	G3	NA
CGGA_P173	0	1448	-5.48626	Mutant	31	Male	G2	non-codel
CGGA_P174	0	1482	-6.18794	Mutant	31	Male	G2	codel
CGGA_P175	1	183	-3.86839	WT	45	Male	G4	NA
CGGA_P176	0	804	-6.39901	Mutant	32	Female	G2	codel
CGGA_P177	0	1442	-5.96002	WT	43	Male	G2	non-codel
CGGA_P178	0	1442	-4.24024	WT	52	Female	G4	NA
CGGA_P179	0	1454	-6.98634	Mutant	53	Female	G2	non-codel
CGGA_P18	1	387	-6.51909	Mutant	40	Male	G3	non-codel
CGGA_P180	1	260	-4.97659	Mutant	47	Male	G4	NA
CGGA_P181	1	238	-6.44243	WT	21	Female	G3	non-codel
CGGA_P182	0	1512	-3.89746	WT	58	Female	G4	non-codel
CGGA_P183	0	1512	-5.76539	Mutant	58	Male	G3	codel
CGGA_P185	1	502	-5.42074	Mutant	41	Female	G3	non-codel
CGGA_P19	0	1924	-5.61831	Mutant	39	Male	G2	non-codel
CGGA_P199	1	203	-5.28084	WT	66	Male	G4	non-codel
CGGA_P20	0	1923	-6.27394	Mutant	58	Female	G2	non-codel
CGGA_P205	1	583	-3.03539	WT	66	Male	G4	NA
CGGA_P21	0	1922	-6.76147	Mutant	25	Male	G2	non-codel
CGGA_P22	1	406	-5.57278	WT	62	Male	G4	non-codel
CGGA_P23	1	392	-3.26276	WT	62	Female	G3	NA
CGGA_P25	1	147	-1.9356	WT	64	Male	G4	NA
CGGA_P265	1	779	-2.46355	WT	36	Male	G3	NA
CGGA_P266	1	253	-2.69573	WT	28	Female	G3	NA
CGGA_P269	1	511	-5.99204	WT	47	Female	G3	codel
CGGA_P27	0	413	-6.95741	Mutant	37	Female	G2	non-codel
CGGA_P271	0	1376	-4.11858	Mutant	42	Male	G2	NA
CGGA_P279	0	1334	-7.02139	Mutant	47	Female	G3	codel
CGGA_P28	1	107	-4.87027	WT	61	Male	G4	non-codel
CGGA_P280	0	1342	-6.99644	WT	52	Female	G4	non-codel
CGGA_P283	0	1331	-4.50598	WT	38	Male	G4	non-codel
CGGA_P286	0	658	-6.41507	Mutant	57	Female	G2	codel
CGGA_P29	1	103	-4.24032	Mutant	22	Female	G3	NA
CGGA_P295	1	273	-5.78643	WT	46	Male	G4	non-codel
CGGA_P3	0	2126	-2.67422	Mutant	32	Male	G3	NA
CGGA_P30	1	404	-3.61517	WT	48	Male	G2	non-codel
CGGA_P306	1	922	-7.91084	Mutant	49	Male	G2	codel
CGGA_P308	1	563	-7.03375	Mutant	38	Male	G3	non-codel
CGGA_P31	0	1883	-6.06141	WT	42	Male	G2	non-codel
CGGA_P310	1	224	-6.75389	NA	47	Female	G3	codel
CGGA_P311	0	1247	-6.79622	Mutant	36	Male	G2	non-codel
CGGA_P314	0	1238	-7.92204	Mutant	34	Female	G3	codel
CGGA_P315	1	451	-7.06972	Mutant	47	Female	G2	non-codel
CGGA_P316	0	567	-6.53604	NA	44	Male	G2	non-codel
CGGA_P319	1	508	-6.38862	Mutant	37	Male	G3	non-codel
CGGA_P326	0	1217	-6.84011	Mutant	48	Female	G3	non-codel
CGGA_P328	1	580	-5.57317	Mutant	54	Female	G3	non-codel
CGGA_P335	0	1203	-7.29582	Mutant	42	Male	G4	codel
CGGA_P337	1	689	-6.5694	Mutant	61	Female	G3	codel
CGGA_P338	0	1198	-6.07374	WT	51	Male	G2	non-codel
CGGA_P346	0	522	-6.27195	Mutant	42	Male	G2	non-codel
CGGA_P356	1	569	-6.82281	Mutant	22	Female	G2	non-codel
CGGA_P358	0	1168	-5.57071	Mutant	44	Male	G2	non-codel
CGGA_P364	1	495	-5.23578	Mutant	41	Female	G3	non-codel
CGGA_P385	0	1112	-6.09756	WT	22	Male	G4	non-codel
CGGA_P388	1	293	-6.19641	Mutant	37	Female	G3	non-codel
CGGA_P392	0	1099	-7.56436	Mutant	35	Male	G2	codel
CGGA_P399	0	1090	-6.37633	Mutant	41	Female	G2	codel
CGGA_P401	1	788	-6.43245	Mutant	31	Male	G4	non-codel
CGGA_P411	1	440	-6.472	Mutant	47	Female	G4	non-codel
CGGA_P415	1	195	-5.35862	WT	56	Female	G4	non-codel
CGGA_P416	0	1069	-6.89169	Mutant	29	Male	G3	codel
CGGA_P421	1	308	-7.4241	Mutant	26	Male	G3	non-codel
CGGA_P422	0	1091	-7.68627	Mutant	41	Female	G2	codel
CGGA_P437	0	1023	-7.7115	Mutant	47	Female	G3	codel
CGGA_P438	0	1023	-6.54625	Mutant	41	Male	G3	codel
CGGA_P439	0	1022	-7.33795	Mutant	45	Male	G2	non-codel
CGGA_P446	0	1009	-7.4177	Mutant	47	Female	G3	codel
CGGA_P461	1	599	-6.43579	Mutant	28	Male	G3	non-codel
CGGA_P468	0	974	-7.35479	Mutant	42	Female	G3	codel
CGGA_P483	1	299	-6.63172	WT	41	Male	G3	non-codel
CGGA_P492	0	938	-7.4223	Mutant	44	Female	G2	codel
CGGA_P5	1	378	-5.46935	Mutant	45	Female	G3	non-codel
CGGA_P500	0	930	-7.26392	Mutant	34	Female	G2	codel
CGGA_P501	0	926	-6.55943	Mutant	27	Male	G2	non-codel
CGGA_P505	0	924	-6.04598	Mutant	34	Male	G2	non-codel
CGGA_P508	1	377	-7.34575	Mutant	40	Male	G3	non-codel
CGGA_P510	0	912	-5.65684	Mutant	42	Male	G3	non-codel
CGGA_P512	1	541	-5.04984	WT	23	Male	G4	non-codel
CGGA_P520	0	884	-7.61485	Mutant	44	Female	G3	codel
CGGA_P568	1	218	-6.47797	Mutant	23	Female	G3	codel
CGGA_P585	1	344	-5.15803	WT	50	Male	G4	non-codel
CGGA_P594	1	84	-5.51195	WT	40	Male	G3	non-codel
CGGA_P596	0	777	-7.11388	Mutant	60	Female	G4	codel
CGGA_P604	1	262	-7.87398	WT	15	Female	G3	non-codel
CGGA_P609	0	726	-6.98109	WT	19	Female	G4	non-codel
CGGA_P610	1	345	-5.09397	WT	62	Male	G4	NA
CGGA_P619	1	236	-6.0839	WT	66	Female	G4	non-codel
CGGA_P625	1	161	-5.38673	Mutant	46	Female	G4	non-codel
CGGA_P633	0	676	-7.16772	Mutant	40	Female	G3	non-codel
CGGA_P7	1	110	-3.99892	WT	45	Male	G4	non-codel
CGGA_P83	0	1698	-7.01165	Mutant	28	Female	G2	non-codel
CGGA_P84	0	1694	-6.62803	Mutant	40	Female	G2	non-codel
CGGA_P86	0	1694	-6.79718	Mutant	34	Female	G2	codel
CGGA_P87	1	240	-6.83581	Mutant	32	Male	G4	non-codel
CGGA_P89	1	294	-4.05649	WT	42	Male	G4	non-codel
CGGA_P93	0	1678	-5.60887	Mutant	45	Female	G2	non-codel
CGGA_P98	1	317	-6.51084	Mutant	44	Male	G3	non-codel
CGGA_P99	0	679	-7.1319	Mutant	52	Male	G4	non-codel

## Sheet: Table S3
sample	event	time	Risk score	IDH	age	gender	grade	1p19q
CGGA_1001	0	3817	-3.85152	WT	11	Male	G4	non-codel
CGGA_1006	1	254	-2.38669	WT	42	Male	G3	non-codel
CGGA_1007	1	345	-4.04891	WT	57	Female	G4	non-codel
CGGA_1011	1	109	-4.07235	WT	46	Female	G4	non-codel
CGGA_1015	1	164	-3.34212	WT	62	Male	G4	non-codel
CGGA_1019	1	212	-4.69641	WT	60	Male	G4	non-codel
CGGA_1022	0	518	-3.79384	WT	62	Female	G2	non-codel
CGGA_1023	1	681	-5.25322	WT	56	Female	G4	non-codel
CGGA_1024	1	3074	-4.89404	WT	64	Male	G4	non-codel
CGGA_1026	1	1570	-4.11968	WT	57	Male	G4	non-codel
CGGA_1034	1	753	-5.13243	WT	23	Male	G3	non-codel
CGGA_1035	1	567	-4.16476	WT	60	Female	G4	non-codel
CGGA_1039	1	727	-5.0349	WT	40	Male	G4	non-codel
CGGA_1045	1	348	-3.43226	WT	79	Male	G4	non-codel
CGGA_1049	1	809	-4.08645	WT	58	Male	G4	non-codel
CGGA_1072	1	1090	-4.18032	WT	26	Male	G4	non-codel
CGGA_1077	1	591	-2.93293	WT	47	Male	G4	non-codel
CGGA_1078	1	315	-4.29706	WT	61	Female	G4	non-codel
CGGA_1079	1	471	-4.25568	WT	38	Male	G3	non-codel
CGGA_1081	1	216	-5.87114	WT	30	Female	G3	non-codel
CGGA_1083	1	450	-3.36684	WT	59	Male	G4	non-codel
CGGA_1091	1	1116	-4.41493	WT	51	Female	G4	non-codel
CGGA_1109	1	1348	-3.92574	WT	42	Male	G4	non-codel
CGGA_1124	1	484	-3.49631	WT	47	Male	G4	non-codel
CGGA_1139	1	1196	-5.68844	WT	53	Female	G4	non-codel
CGGA_1140	1	921	-5.98142	WT	49	Female	G3	non-codel
CGGA_1145	1	239	-2.93632	WT	41	Male	G3	non-codel
CGGA_1171	1	412	-3.30893	WT	40	Male	G4	non-codel
CGGA_1177	1	449	-4.23038	WT	40	Male	G4	non-codel
CGGA_1180	0	1226	-5.68675	WT	48	Female	G4	non-codel
CGGA_1188	1	256	-6.087	Mutant	30	Female	G4	non-codel
CGGA_1214	1	604	-5.17775	WT	49	Female	G4	non-codel
CGGA_1216	1	312	-5.50734	WT	44	Male	G4	non-codel
CGGA_1218	1	286	-4.13693	WT	53	Male	G4	non-codel
CGGA_1224	1	271	-4.07477	WT	57	Male	G4	non-codel
CGGA_1234	1	705	-4.53674	WT	32	Male	G4	non-codel
CGGA_1237	1	296	-4.71169	WT	62	Male	G4	non-codel
CGGA_1240	1	19	-3.7754	WT	33	Male	G4	non-codel
CGGA_1251	1	272	-5.5321	WT	42	Female	G4	non-codel
CGGA_1258	1	114	-5.54792	WT	42	Male	G4	non-codel
CGGA_1263	1	772	-6.43455	WT	50	Male	G3	non-codel
CGGA_1270	1	188	-5.28139	WT	60	Female	G4	non-codel
CGGA_1271	1	523	-3.69017	WT	17	Male	G4	non-codel
CGGA_1272	1	124	-5.62257	Mutant	32	Male	G4	non-codel
CGGA_1280	1	447	-5.07698	WT	74	Male	G3	non-codel
CGGA_1281	0	2909	-5.55745	WT	45	Male	G3	codel
CGGA_1283	1	20	-6.11859	WT	17	Male	G4	non-codel
CGGA_1284	1	97	-3.80303	WT	73	Male	G3	non-codel
CGGA_1285	1	79	-5.2766	WT	58	Female	G4	non-codel
CGGA_1292	0	2901	-6.13201	WT	17	Male	G3	non-codel
CGGA_1299	1	550	-4.95217	WT	54	Male	G4	non-codel
CGGA_1301	1	239	-4.95856	WT	48	Male	G4	non-codel
CGGA_1313	1	379	-4.26181	WT	42	Male	G4	non-codel
CGGA_1320	1	59	-6.01317	WT	19	Male	G4	non-codel
CGGA_1332	0	510	-5.69274	WT	55	Female	G4	non-codel
CGGA_1338	1	1122	-4.11628	WT	61	Female	G4	non-codel
CGGA_1340	1	1109	-5.16715	WT	35	Male	G3	non-codel
CGGA_1342	1	186	-4.50809	WT	47	Male	G4	non-codel
CGGA_1343	1	94	-4.60026	WT	34	Male	G4	non-codel
CGGA_1346	1	284	-5.162	WT	57	Female	G4	non-codel
CGGA_1370	0	325	-4.88636	WT	43	Male	G4	non-codel
CGGA_1393	1	275	-4.93679	WT	41	Male	G4	non-codel
CGGA_1408	1	1362	-3.03256	WT	64	Female	G3	non-codel
CGGA_1411	1	329	-5.00866	WT	40	Female	G3	non-codel
CGGA_235	1	2340	-6.35438	Mutant	24	Male	G2	codel
CGGA_269	0	2932	-4.91745	WT	45	Female	G2	non-codel
CGGA_272	1	217	-4.06007	WT	51	Male	G4	non-codel
CGGA_274	0	610	-4.57095	WT	55	Female	G4	non-codel
CGGA_276	0	529	-6.13825	Mutant	44	Male	G2	non-codel
CGGA_309	1	139	-4.20671	WT	44	Male	NA	NA
CGGA_318	1	222	-3.7309	WT	40	Female	G4	non-codel
CGGA_323	0	4338	-5.73125	WT	48	Female	G2	non-codel
CGGA_330	1	1121	-4.14386	WT	45	Male	G3	non-codel
CGGA_413	0	183	-4.69998	WT	54	Male	G4	non-codel
CGGA_426	1	1560	-4.18332	WT	50	Male	G3	non-codel
CGGA_448	1	354	-3.84373	WT	64	Male	G3	non-codel
CGGA_483	1	277	-2.82305	WT	59	Female	G4	non-codel
CGGA_488	1	435	-7.90061	WT	23	Male	G3	non-codel
CGGA_493	1	2382	-6.43968	Mutant	32	Female	G2	non-codel
CGGA_494	0	4435	-6.1057	WT	58	Female	G4	non-codel
CGGA_495	1	295	-5.16359	WT	53	Male	NA	NA
CGGA_499	1	122	-5.49082	WT	51	Male	G4	non-codel
CGGA_525	1	138	-3.26311	WT	61	Male	G4	non-codel
CGGA_541	0	4376	-5.85911	WT	36	Female	G2	non-codel
CGGA_564	1	679	-3.53789	WT	47	Male	G3	non-codel
CGGA_565	0	3605	-5.86184	WT	51	Male	G3	non-codel
CGGA_578	1	362	-5.89283	WT	61	Female	G3	non-codel
CGGA_599	1	418	-5.4716	WT	66	Female	G3	non-codel
CGGA_604	1	381	-3.61114	WT	46	Male	G4	non-codel
CGGA_616	1	952	-4.18288	WT	43	Male	G3	non-codel
CGGA_624	1	122	-3.98662	WT	50	Female	G4	non-codel
CGGA_630	0	4300	-5.83429	Mutant	43	Male	G3	codel
CGGA_633	1	1812	-5.86659	WT	56	Female	G2	non-codel
CGGA_638	0	2386	-5.35135	Mutant	42	Male	G2	codel
CGGA_643	1	331	-5.39683	WT	56	Male	G3	non-codel
CGGA_658	1	372	-4.14708	WT	55	Male	G4	non-codel
CGGA_659	0	730	-5.60121	WT	50	Female	G2	non-codel
CGGA_669	1	607	-6.1169	WT	56	Female	G4	codel
CGGA_676	1	376	-2.90198	WT	60	Male	G4	non-codel
CGGA_678	1	386	-3.6205	WT	56	Male	G3	non-codel
CGGA_679	1	263	-4.21374	WT	63	Female	G4	non-codel
CGGA_680	1	2373	-4.72451	WT	44	Male	G4	non-codel
CGGA_681	1	110	-5.42994	WT	42	Male	NA	NA
CGGA_700	0	170	-5.97618	Mutant	24	Female	G4	non-codel
CGGA_727	1	1023	-4.06755	WT	45	Male	G3	non-codel
CGGA_731	1	503	-4.17087	WT	50	Male	G4	non-codel
CGGA_766	0	4103	-5.39187	Mutant	32	Male	G2	codel
CGGA_773	1	443	-5.65702	Mutant	51	Female	G4	non-codel
CGGA_782	1	289	-5.39193	WT	60	Male	G4	non-codel
CGGA_789	1	345	-4.60592	WT	50	Male	G4	non-codel
CGGA_791	1	252	-5.52199	WT	55	Male	G3	non-codel
CGGA_796	0	559	-5.05808	WT	60	Male	G2	non-codel
CGGA_802	1	681	-4.02277	WT	42	Male	G4	non-codel
CGGA_804	0	614	-5.80201	WT	53	Female	G4	non-codel
CGGA_807	0	4040	-6.26441	WT	42	Male	G2	non-codel
CGGA_808	0	1167	-5.0027	WT	38	Male	G4	non-codel
CGGA_837	1	432	-4.43915	WT	57	Male	G4	non-codel
CGGA_842	1	204	-3.97911	WT	63	Female	G4	non-codel
CGGA_848	0	239	-4.01159	WT	54	Female	G4	non-codel
CGGA_850	0	564	-4.52614	WT	52	Female	G4	non-codel
CGGA_859	1	387	-4.14805	WT	56	Male	G4	non-codel
CGGA_871	0	3964	-5.97103	Mutant	37	Male	G2	codel
CGGA_876	1	159	-3.08062	WT	60	Female	G4	non-codel
CGGA_878	1	863	-3.36902	WT	42	Male	G4	non-codel
CGGA_902	1	193	-5.58291	WT	54	Male	G4	non-codel
CGGA_D02	1	484	-4.95604	WT	44	Male	G4	non-codel
CGGA_D03	1	423	-4.00751	WT	44	Male	G4	non-codel
CGGA_D09	1	233	-3.69645	WT	57	Male	G4	non-codel
CGGA_D11	1	827	-4.63603	WT	53	Female	G3	non-codel
CGGA_D16	1	261	-4.48147	WT	59	Female	G3	non-codel
CGGA_D26	1	263	-3.98154	WT	55	Male	G4	non-codel
CGGA_D32	1	358	-3.13638	WT	61	Male	G4	non-codel
CGGA_D35	1	661	-3.91313	WT	68	Female	G4	non-codel
CGGA_D36	1	34	-3.21166	WT	58	Male	G4	non-codel
CGGA_D37	1	965	-3.9676	WT	55	Male	G4	non-codel
CGGA_D44	1	313	-3.997	WT	18	Female	G3	non-codel
CGGA_D51	1	135	-4.92103	WT	60	Female	G4	non-codel
CGGA_D57	1	766	-4.44054	WT	40	Male	G4	non-codel
CGGA_D58	1	181	-5.32043	WT	24	Male	G3	codel
CGGA_342	1	500	-4.37641	WT	49	Female	G4	NA
CGGA_719	1	101	-5.05332	Mutant	51	Male	G4	NA
CGGA_J030	0	3389	-6.45157	Mutant	38	Male	G2	codel
CGGA_J130	0	3116	-5.40302	WT	40	Male	G2	non-codel
CGGA_1005	0	3815	-6.46672	Mutant	41	Female	G2	non-codel
CGGA_1013	1	1725	-5.65501	Mutant	38	Female	G2	non-codel
CGGA_1020	1	1120	-5.52384	Mutant	38	Female	G2	non-codel
CGGA_1027	0	2688	-5.96816	Mutant	37	Male	G3	codel
CGGA_1031	1	2457	-5.79905	Mutant	31	Female	G2	non-codel
CGGA_1046	0	3559	-5.69628	NA	21	Male	G2	NA
CGGA_1060	1	227	-4.79148	Mutant	42	Male	G4	non-codel
CGGA_1061	1	532	-5.41379	Mutant	43	Female	G3	non-codel
CGGA_1068	1	68	-4.77914	Mutant	29	Male	G4	non-codel
CGGA_1094	1	252	-4.42279	Mutant	40	Female	G3	non-codel
CGGA_1105	1	609	-6.23435	Mutant	29	Male	G4	non-codel
CGGA_1113	1	1265	-5.04841	Mutant	34	Male	G3	codel
CGGA_1129	1	168	-6.37183	Mutant	34	Male	G4	non-codel
CGGA_1136	1	236	-5.16957	Mutant	38	Female	G4	non-codel
CGGA_1146	0	2498	-5.39615	Mutant	35	Male	G3	non-codel
CGGA_1160	1	426	-4.57225	Mutant	43	Female	G3	non-codel
CGGA_1170	1	346	-5.14721	Mutant	25	Male	G4	non-codel
CGGA_1175	1	441	-5.30711	Mutant	36	Female	G4	non-codel
CGGA_1189	0	3082	-5.96507	Mutant	34	Female	G3	codel
CGGA_1190	0	3082	-5.59255	Mutant	45	Female	G3	non-codel
CGGA_1215	1	29	-5.91633	Mutant	37	Male	G3	non-codel
CGGA_1219	1	2120	-6.09657	Mutant	57	Female	G4	non-codel
CGGA_1227	1	1197	-4.92352	WT	46	Female	G4	non-codel
CGGA_1231	1	2279	-5.23347	WT	31	Female	G3	non-codel
CGGA_1287	1	533	-4.79425	Mutant	29	Male	G4	non-codel
CGGA_1307	0	965	-5.22056	Mutant	25	Female	G3	non-codel
CGGA_1314	1	172	-4.30045	Mutant	27	Female	G4	non-codel
CGGA_1322	1	253	-6.38965	Mutant	10	Male	G3	non-codel
CGGA_1324	1	848	-5.92766	Mutant	42	Male	G4	codel
CGGA_1329	1	326	-5.74646	Mutant	43	Female	G3	non-codel
CGGA_1330	0	2846	-5.66869	Mutant	47	Male	G2	non-codel
CGGA_1374	1	141	-4.75004	Mutant	22	Male	G3	non-codel
CGGA_1375	1	92	-6.11149	Mutant	50	Female	G4	non-codel
CGGA_1381	1	46	-5.2943	Mutant	36	Female	G4	non-codel
CGGA_1384	1	191	-6.00544	Mutant	39	Female	G4	non-codel
CGGA_1388	1	485	-5.11515	Mutant	37	Male	G3	non-codel
CGGA_1394	1	139	-6.91855	Mutant	37	Male	G4	non-codel
CGGA_1406	1	2154	-6.00943	Mutant	34	Male	G2	non-codel
CGGA_1409	0	2727	-5.82728	Mutant	24	Female	G4	non-codel
CGGA_1412	1	296	-5.54495	Mutant	48	Female	G4	codel
CGGA_236	0	706	-5.69843	Mutant	47	Male	G2	codel
CGGA_241	0	4809	-5.59159	Mutant	34	Male	G2	non-codel
CGGA_245	1	318	-4.88233	Mutant	39	Female	G3	non-codel
CGGA_251	0	1299	-6.06579	Mutant	45	Male	G2	non-codel
CGGA_252	0	165	-6.85111	Mutant	24	Female	G2	non-codel
CGGA_254	0	4793	-6.4989	Mutant	38	Male	G2	codel
CGGA_256	0	158	-6.00944	Mutant	39	Male	G2	non-codel
CGGA_261	0	4130	-6.10315	Mutant	27	Male	G2	non-codel
CGGA_267	1	1374	-5.29997	Mutant	36	Male	G2	non-codel
CGGA_273	1	2635	-5.56485	Mutant	35	Female	G2	non-codel
CGGA_283	1	3470	-6.21609	Mutant	47	Female	G2	codel
CGGA_300	1	2199	-6.30614	Mutant	35	Female	G2	non-codel
CGGA_314	1	2568	-6.17586	Mutant	39	Male	G3	codel
CGGA_333	0	1783	-5.26272	Mutant	40	Male	G2	non-codel
CGGA_337	1	1008	-5.04599	Mutant	50	Female	G3	non-codel
CGGA_374	1	493	-5.96593	Mutant	37	Male	G4	non-codel
CGGA_400	1	1321	-5.51252	Mutant	38	Female	G3	non-codel
CGGA_431	0	4515	-6.50638	Mutant	41	Male	G3	codel
CGGA_446	0	4508	-6.71982	Mutant	35	Female	G2	codel
CGGA_458	1	419	-5.83453	Mutant	51	Male	G2	non-codel
CGGA_479	0	4445	-6.10049	Mutant	36	Female	G2	codel
CGGA_485	0	2437	-5.50248	Mutant	31	Male	G2	codel
CGGA_490	0	3804	-6.03227	Mutant	37	Female	G3	codel
CGGA_491	1	1074	-6.26027	Mutant	36	Female	G4	non-codel
CGGA_501	0	4427	-5.82655	Mutant	40	Male	G2	codel
CGGA_502	0	4414	-5.78835	Mutant	39	Male	G2	non-codel
CGGA_510	0	4403	-6.41018	Mutant	42	Male	G3	codel
CGGA_543	0	4371	-6.00637	Mutant	43	Male	G2	codel
CGGA_545	1	555	-4.65038	Mutant	38	Female	G4	non-codel
CGGA_551	0	4363	-5.91174	Mutant	44	Male	G2	codel
CGGA_560	0	4354	-5.74626	Mutant	43	Male	G3	non-codel
CGGA_580	1	1394	-5.57741	Mutant	43	Male	G2	non-codel
CGGA_591	1	1654	-5.8988	Mutant	50	Female	G3	non-codel
CGGA_598	1	3677	-6.34103	Mutant	61	Female	G3	codel
CGGA_601	1	1133	-5.68215	Mutant	36	Male	G2	non-codel
CGGA_603	0	168	-5.5762	Mutant	32	Male	G3	non-codel
CGGA_605	0	4300	-4.4233	Mutant	43	Male	G3	non-codel
CGGA_607	0	1389	-5.63793	Mutant	25	Male	G2	non-codel
CGGA_632	1	576	-5.49473	Mutant	29	Female	G2	non-codel
CGGA_635	0	4263	-6.66992	Mutant	45	Male	G2	codel
CGGA_641	1	3411	-6.2478	Mutant	51	Female	G3	codel
CGGA_642	0	4249	-6.36129	Mutant	29	Male	G2	non-codel
CGGA_655	0	4231	-6.27254	Mutant	35	Male	G2	codel
CGGA_662	1	284	-5.78747	Mutant	59	Female	G2	codel
CGGA_666	1	2499	-6.12114	Mutant	45	Female	G2	codel
CGGA_671	0	4215	-5.70991	Mutant	36	Female	G2	codel
CGGA_675	0	4210	-6.08831	Mutant	23	Female	G2	codel
CGGA_685	1	3239	-6.03965	Mutant	20	Female	G2	non-codel
CGGA_689	0	4194	-6.06812	Mutant	36	Female	G2	codel
CGGA_694	1	1194	-5.19151	Mutant	34	Male	G2	non-codel
CGGA_698	1	1851	-5.87241	Mutant	61	Female	G2	non-codel
CGGA_704	1	2572	-6.26848	Mutant	36	Male	G2	non-codel
CGGA_710	1	660	-5.28789	Mutant	41	Male	G4	non-codel
CGGA_715	0	3429	-5.8936	Mutant	43	Male	G2	codel
CGGA_725	0	4147	-6.23068	Mutant	58	Male	G2	codel
CGGA_747	1	970	-6.50121	Mutant	29	Male	G4	non-codel
CGGA_752	0	3680	-5.31971	Mutant	39	Male	G2	codel
CGGA_757	1	1047	-5.61289	Mutant	45	Male	G2	non-codel
CGGA_760	0	4110	-6.34197	Mutant	34	Female	G2	codel
CGGA_761	1	1840	-6.69414	Mutant	45	Male	G4	non-codel
CGGA_762	0	4105	-5.80451	Mutant	40	Female	G2	codel
CGGA_785	1	3517	-6.34121	Mutant	43	Male	G2	codel
CGGA_812	0	4035	-5.10879	Mutant	27	Male	G2	codel
CGGA_815	1	2219	-6.17428	Mutant	53	Female	G2	non-codel
CGGA_818	0	4027	-5.58318	Mutant	46	Male	G2	non-codel
CGGA_822	1	2237	-6.31379	Mutant	46	Male	G4	non-codel
CGGA_834	0	4013	-4.3532	WT	24	Male	G2	non-codel
CGGA_835	0	517	-6.1121	Mutant	31	Male	G2	codel
CGGA_838	0	4011	-6.00217	Mutant	36	Female	G2	codel
CGGA_843	0	4005	-6.31684	Mutant	29	Male	G2	codel
CGGA_856	0	1297	-6.37291	Mutant	53	Male	G2	codel
CGGA_858	0	3984	-6.60993	Mutant	42	Male	G2	codel
CGGA_864	0	3977	-5.8728	Mutant	34	Male	G2	codel
CGGA_884	1	1131	-5.38495	Mutant	48	Female	G2	non-codel
CGGA_892	0	448	-6.26874	Mutant	34	Male	G2	codel
CGGA_893	1	3160	-6.10425	Mutant	36	Female	G2	non-codel
CGGA_898	1	1663	-5.94173	Mutant	38	Male	G2	non-codel
CGGA_899	1	231	-5.65136	Mutant	48	Male	G4	non-codel
CGGA_904	1	774	-5.55158	Mutant	33	Male	G2	non-codel
CGGA_905	1	3174	-5.92268	Mutant	46	Male	G2	non-codel
CGGA_908	1	2436	-6.26925	Mutant	35	Male	G2	non-codel
CGGA_909	0	3920	-5.2575	Mutant	39	Female	G2	non-codel
CGGA_D04	0	3697	-6.21521	Mutant	37	Male	G2	non-codel
CGGA_D07	0	3691	-6.03636	Mutant	36	Male	G2	codel
CGGA_D15	0	3669	-6.61031	Mutant	38	Female	G2	codel
CGGA_D20	1	2367	-6.40467	Mutant	40	Female	G2	non-codel
CGGA_D21	1	1208	-5.02507	Mutant	37	Female	G3	non-codel
CGGA_D24	1	837	-5.61414	Mutant	37	Female	G3	non-codel
CGGA_D27	0	3650	-6.41479	Mutant	33	Male	G3	codel
CGGA_D29	0	3643	-6.27158	Mutant	36	Male	G2	codel
CGGA_D33	1	116	-5.1068	Mutant	38	Male	G3	non-codel
CGGA_D34	1	147	-5.80336	Mutant	45	Male	G4	non-codel
CGGA_D38	1	689	-6.36364	Mutant	41	Female	G4	codel
CGGA_D40	0	3557	-5.84661	Mutant	44	Male	G2	non-codel
CGGA_D45	0	856	-5.50753	Mutant	32	Male	G3	non-codel
CGGA_D46	1	300	-5.8617	Mutant	36	Female	G3	non-codel
CGGA_D47	1	1048	-5.71226	Mutant	36	Male	G2	codel
CGGA_D48	1	221	-5.3423	Mutant	23	Female	G3	non-codel
CGGA_D52	0	3529	-6.24904	Mutant	46	Male	G3	codel
CGGA_D56	1	64	-5.02556	Mutant	45	Male	G3	non-codel
CGGA_277	0	4739	-6.27048	Mutant	40	Male	G3	NA
CGGA_518	1	212	-6.66064	Mutant	27	Male	G4	NA
CGGA_J023	1	1028	-6.53646	Mutant	36	Male	G3	non-codel
CGGA_J024	0	3410	-7.04054	Mutant	29	Female	G2	non-codel
CGGA_J042	1	1409	-5.83614	Mutant	38	Male	G2	non-codel
CGGA_1004	1	899	-3.56834	WT	63	Female	G2	non-codel
CGGA_1008	1	315	-5.06641	WT	54	Female	G4	non-codel
CGGA_1053	1	370	-5.20966	WT	63	Female	G4	non-codel
CGGA_1059	1	21	-5.6508	Mutant	54	Female	G2	non-codel
CGGA_1070	1	333	-3.99406	WT	37	Male	G4	non-codel
CGGA_1071	1	3252	-3.95967	WT	42	Male	G2	non-codel
CGGA_1073	1	270	-4.41101	WT	42	Female	G4	non-codel
CGGA_1074	1	86	-3.50426	WT	50	Male	G4	non-codel
CGGA_1095	1	2778	-5.98459	Mutant	29	Male	NA	non-codel
CGGA_1099	1	122	-3.86675	WT	8	Male	G4	non-codel
CGGA_1114	1	460	-4.75416	WT	53	Male	G4	non-codel
CGGA_1116	1	248	-5.56302	Mutant	43	Female	G4	non-codel
CGGA_1118	1	398	-4.93787	Mutant	31	Male	G3	non-codel
CGGA_1119	1	422	-6.24286	Mutant	52	Male	G4	codel
CGGA_1197	1	942	-6.75256	Mutant	43	Male	G4	codel
CGGA_1246	0	2972	-6.28319	Mutant	53	Male	G3	codel
CGGA_1275	1	183	-5.8134	WT	70	Male	G4	non-codel
CGGA_1450	1	957	-7.23007	Mutant	37	Male	G4	codel
CGGA_1460	1	209	-5.22755	WT	51	Male	G4	non-codel
CGGA_1475	1	182	-5.34369	Mutant	38	Male	G4	non-codel
CGGA_243	0	2977	-6.41914	Mutant	30	Female	G2	codel
CGGA_247	1	609	-6.46539	Mutant	60	Male	G3	non-codel
CGGA_738	0	4132	-5.27313	Mutant	43	Male	G2	non-codel
CGGA_759	1	1263	-4.86022	Mutant	30	Male	G4	non-codel
CGGA_D30	1	215	-5.02047	WT	70	Male	G4	non-codel

## Sheet: Table S4
sample	event	time	Risk score	age	gender	grade
GSM405234	1	226	-3.88544	57.68	Female	G4
GSM405235	1	76	-2.9457	71.09	Male	G4
GSM405236	1	375	-4.1048	52.2	Male	G4
GSM405237	1	149	-3.91601	51.17	Male	G4
GSM405203	1	3255	-6.23774	38.58	Male	G3
GSM405238	1	343	-5.2849	37.25	Male	G4
GSM405239	1	215	-4.06624	73.65	Female	G4
GSM405240	0	2416	-4.08904	33.09	Male	G4
GSM405241	1	58	-4.59598	55.98	Male	G4
GSM405242	1	65	-6.04796	30.33	Male	G4
GSM405243	1	321	-4.67748	61.33	Male	G4
GSM405244	1	748	-6.12693	29.55	Male	G4
GSM405245	1	510	-4.92639	37.98	Male	G4
GSM405204	1	3135	-6.83159	33.89	Male	G3
GSM405263	1	565	-4.87045	61.74	Male	G4
GSM405264	1	116	-4.22668	36.5	Male	G4
GSM405265	1	660	-5.28684	32.14	Female	G3
GSM405266	1	91	-5.3379	51.62	Male	G4
GSM405267	1	237	-5.49247	53.3	Female	G4
GSM405268	1	233	-4.41771	48.04	Male	G4
GSM405269	1	10	-3.96108	54.59	Male	G4
GSM405270	1	211	-4.07919	73.11	Female	G4
GSM405271	1	109	-4.98943	69.89	Male	G4
GSM405273	1	197	-3.17658	56.42	Male	G3
GSM405274	1	470	-4.66689	63.08	Female	G4
GSM405275	1	1262	-6.57504	60.39	Female	G4
GSM405205	1	1182	-5.41062	48.03	Male	G3
GSM405294	1	292	-4.63369	56.41	Male	G4
GSM405295	1	726	-4.78985	41.77	Male	G3
GSM405296	1	105	-4.91176	41.09	Female	G4
GSM405297	1	262	-5.75865	67.13	Female	G4
GSM405298	1	715	-6.30995	42.56	Female	G3
GSM405206	1	2485	-6.71595	31.53	Male	G3
GSM405299	1	638	-4.34267	54.94	Female	G4
GSM405300	1	1036	-5.14244	33.26	Male	G3
GSM405301	1	109	-4.56339	65.35	Male	G4
GSM405302	1	270	-4.71901	41.39	Male	G4
GSM405303	1	200	-4.94814	56.64	Male	G4
GSM405304	1	204	-3.64064	66.39	Male	G4
GSM405305	1	386	-4.7971	52.69	Male	G4
GSM405306	0	2978	-5.546	15.67	Male	G1
GSM405307	1	120	-3.28116	72.22	Male	G4
GSM405207	1	2963	-7.12033	44.41	Female	G3
GSM405208	1	1109	-6.93981	51.4	Male	G3
GSM405326	1	98	-4.497	74.56	Male	G4
GSM405327	1	1204	-6.01071	66.86	Male	G3
GSM405328	1	824	-4.39631	67.6	Male	G4
GSM405329	1	1832	-5.94597	60.33	Male	G3
GSM405330	1	259	-6.01861	33.12	Female	G4
GSM405331	0	3003	-6.75148	59.56	Female	G3
GSM405333	1	3325	-7.15564	57.64	Female	G3
GSM405334	1	536	-5.17711	57.01	Female	G3
GSM405335	1	2715	-6.75387	65.59	Female	G3
GSM405337	1	102	-5.44994	15.02	Female	G4
GSM405338	1	2905	-6.69913	50.23	Female	G2
GSM405355	1	434	-6.40514	73.19	Female	G2
GSM405356	1	65	-4.64408	43.21	Female	G4
GSM405361	1	598	-3.96583	79.19	Female	G3
GSM405362	1	386	-4.49028	38.11	Male	G4
GSM405363	1	3573	-4.3232	48.84	Female	G4
GSM405364	1	3595	-5.2229	37.61	Female	G3
GSM405365	1	970	-4.66557	64.29	Male	G4
GSM405366	1	806	-5.31125	75.13	Male	G3
GSM405367	1	956	-6.29861	46.83	Male	G4
GSM405368	1	660	-4.52924	32.14	Female	G4
GSM405369	1	1507	-6.09529	50.34	Female	G4
GSM405210	1	3752	-7.15115	38.53	Male	G3
GSM405386	1	1372	-6.81502	53.85	Male	G2
GSM405387	1	4164	-6.42255	37.11	Female	G3
GSM405388	1	193	-3.3088	78.52	Male	G3
GSM405390	1	7	-4.66512	70.07	Male	G3
GSM405391	1	383	-4.84792	55.55	Female	G4
GSM405392	1	171	-4.90369	48.35	Male	G4
GSM405393	1	29	-4.35254	70.67	Male	G4
GSM405395	1	1372	-7.59621	55.42	Male	G2
GSM405414	1	1945	-5.95496	35.23	Male	G3
GSM405415	1	182	-4.21267	67.48	Male	G4
GSM405416	1	124	-4.61637	64.26	Male	G4
GSM405417	1	7	-4.38184	77.31	Male	G4
GSM405418	1	1887	-5.789	46.61	Male	G4
GSM405419	1	1069	-6.08915	36.27	Male	G4
GSM405420	1	1095	-6.24043	49.94	Female	G3
GSM405421	0	2219	-5.62187	38.4	Female	G3
GSM405422	1	332	-4.25145	70.67	Female	G4
GSM405423	1	2233	-5.60002	35.67	Male	G3
GSM405424	1	1168	-6.79377	33.25	Female	G2
GSM405425	1	5858	-6.57779	32.98	Male	G2
GSM405426	1	18	-4.0962	67.1	Male	G4
GSM405427	1	558	-5.8311	50.83	Female	G4
GSM405428	1	288	-4.83408	70.51	Female	G4
GSM405211	1	667	-5.07725	34.93	Male	G3
GSM405212	1	6383	-7.12268	23.33	Male	G3
GSM405213	1	489	-4.69736	44.09	Male	G4
GSM405447	1	1018	-3.40849	59.03	Male	G4
GSM405448	1	175	-4.73024	58.71	Female	G4
GSM405449	1	737	-5.671	45.39	Female	G3
GSM405450	0	4854	-5.69728	36.66	Female	G3
GSM405451	1	1346	-5.85107	28.55	Male	G2
GSM405452	1	127	-5.54388	71.02	Female	G4
GSM405453	1	76	-4.10963	70.23	Male	G4
GSM405214	1	547	-3.36844	37.84	Male	G4
GSM405454	1	1211	-3.44103	22.52	Male	G4
GSM405455	1	83	-4.55332	55.49	Female	G4
GSM405457	1	109	-3.48128	70.98	Male	G3
GSM405458	1	576	-4.51997	68.46	Male	G4
GSM405459	1	416	-3.65555	64.28	Female	G4
GSM405460	1	175	-3.91453	52.52	Male	G3
GSM405215	1	839	-5.42031	51.44	Male	G4
GSM405216	1	1197	-6.47289	52.06	Male	G4
GSM405217	0	2471	-5.28588	33.2	Male	G4
GSM405218	1	233	-4.71608	32.36	Male	G4
GSM405219	1	211	-4.6794	57.25	Male	G4
GSM405479	1	138	-4.08056	63.3	Male	G4
GSM405481	0	3785	-4.68827	33.88	Male	G1
GSM405482	0	4091	-5.42804	37.02	Female	G1
GSM405220	1	463	-4.08592	54.12	Male	G4
GSM405221	1	251	-4.63576	55.52	Male	G4
GSM405222	1	474	-5.95539	54.06	Male	G4
GSM405201	1	3584	-6.81897	44.57	Female	G3
GSM405223	1	700	-5.75833	53.26	Female	G4
GSM405224	1	175	-5.38134	47.74	Male	G4
GSM405225	1	1266	-6.26921	31.56	Male	G3
GSM405226	1	102	-5.29356	48.6	Female	G3
GSM405227	1	1741	-6.3938	48.1	Female	G3
GSM405228	1	259	-4.56618	45.71	Male	G4
GSM405229	1	240	-5.26935	54.18	Female	G4
GSM405202	1	4259	-5.84872	28.69	Male	G3
GSM405230	1	171	-4.37692	63.33	Female	G4
GSM405231	1	459	-5.27987	62.96	Female	G4
GSM405232	1	357	-6.11924	35.7	Male	G4
GSM405233	1	313	-3.6837	51.64	Male	G4
